# Supplementary material
Source: PubMed Central journal article supplement (PMC3697823)
Supplement: NIHMS53786-supplement-01.pdf [file NIHMS53786-supplement-01.pdf]

**Supplementary Digital Content**

Supplementary Digital Content 1: .doc

Supplementary Digital Content 2: .doc

Supplementary Digital Content 3: .doc

Supplementary Digital Content 4: .doc

Supplementary Digital Content 5: .doc

Supplementary Digital Content 6: .doc

Supplementary Digital Content 7: .doc

Supplementary Digital Content 8: .doc

Supplementary Digital Content 9: .doc

Supplementary Digital Content 10: .doc

Supplementary Digital Content 11: .doc

Supplementary Digital Content 12: .doc

Supplementary Digital Content 13: .doc

Supplementary Digital Content 14: .doc

Table S1

*MMPI item-level associations of personality and mortality risk, adjusting for age and ethnicity.*

| Item <sup>1</sup> | Sample 1 |        |           |               |       |                       | Sample 2 |        |           |               |       |                       |
|-------------------|----------|--------|-----------|---------------|-------|-----------------------|----------|--------|-----------|---------------|-------|-----------------------|
|                   | <i>N</i> | Deaths | <i>HR</i> | 95% <i>CI</i> |       | <i>p</i> <sup>2</sup> | <i>N</i> | Deaths | <i>HR</i> | 95% <i>CI</i> |       | <i>p</i> <sup>2</sup> |
|                   |          |        |           | Lower         | Upper |                       |          |        |           | Lower         | Upper |                       |
| 1                 | 2195     | 124    | 0.96      | 0.67          | 1.38  | .832                  | 2209     | 124    | 0.89      | 0.62          | 1.28  | .526                  |
| 2                 | 2199     | 124    | 0.36      | 0.21          | 0.61  | .000                  | 2210     | 124    | 0.57      | 0.31          | 1.06  | .078                  |
| 3                 | 2200     | 124    | 0.68      | 0.47          | 0.98  | .040                  | 2210     | 124    | 0.58      | 0.41          | 0.83  | .003                  |
| 4                 | 2200     | 124    | 1.06      | 0.59          | 1.88  | .855                  | 2210     | 124    | 0.97      | 0.54          | 1.77  | .929                  |
| 5                 | 2201     | 124    | 1.54      | 1.04          | 2.27  | .032                  | 2209     | 124    | 1.27      | 0.87          | 1.86  | .210                  |
| 6                 | 2199     | 124    | 1.55      | 1.08          | 2.21  | .016                  | 2208     | 123    | 1.27      | 0.89          | 1.82  | .187                  |
| 7                 | 2200     | 124    | 0.69      | 0.45          | 1.04  | .078                  | 2207     | 124    | 1.02      | 0.64          | 1.61  | .948                  |
| 8*                | 2200     | 124    | 0.50      | 0.33          | 0.73  | .000                  | 2210     | 124    | 0.41      | 0.28          | 0.59  | .000                  |
| 9*                | 2200     | 124    | 0.33      | 0.23          | 0.48  | .000                  | 2209     | 124    | 0.35      | 0.23          | 0.52  | .000                  |
| 10                | 2199     | 124    | 1.88      | 1.11          | 3.19  | .019                  | 2207     | 122    | 1.67      | 0.92          | 3.03  | .093                  |
| 11                | 2191     | 123    | 1.50      | 1.03          | 2.18  | .036                  | 2194     | 123    | 1.23      | 0.84          | 1.79  | .292                  |

| Item <sup>1</sup> | Sample 1 |        |           |               |       |                       | Sample 2 |        |           |               |       |                       |
|-------------------|----------|--------|-----------|---------------|-------|-----------------------|----------|--------|-----------|---------------|-------|-----------------------|
|                   | <i>N</i> | Deaths | <i>HR</i> | 95% <i>CI</i> |       | <i>p</i> <sup>2</sup> | <i>N</i> | Deaths | <i>HR</i> | 95% <i>CI</i> |       | <i>p</i> <sup>2</sup> |
|                   |          |        |           | Lower         | Upper |                       |          |        |           | Lower         | Upper |                       |
| 12                | 2197     | 124    | 1.77      | 1.17          | 2.69  | .007                  | 2209     | 124    | 1.02      | 0.70          | 1.48  | .923                  |
| 13                | 2197     | 124    | 1.13      | 0.79          | 1.61  | .499                  | 2207     | 124    | 1.20      | 0.84          | 1.71  | .315                  |
| 14                | 2200     | 124    | 1.71      | 1.15          | 2.55  | .008                  | 2210     | 124    | 1.53      | 1.04          | 2.25  | .031                  |
| 15                | 2198     | 124    | 1.42      | 1.00          | 2.02  | .053                  | 2209     | 123    | 1.91      | 1.32          | 2.75  | .001                  |
| 16*               | 2200     | 124    | 2.36      | 1.49          | 3.72  | .000                  | 2206     | 124    | 2.52      | 1.63          | 3.89  | .000                  |
| 17                | 2185     | 123    | 0.80      | 0.43          | 1.49  | .478                  | 2193     | 124    | 0.61      | 0.36          | 1.02  | .060                  |
| 18                | 2198     | 124    | 1.01      | 0.63          | 1.62  | .964                  | 2205     | 124    | 0.50      | 0.34          | 0.74  | .000                  |
| 19                | 2186     | 124    | 1.60      | 1.04          | 2.45  | .033                  | 2198     | 124    | 0.86      | 0.52          | 1.42  | .557                  |
| 20                | 2200     | 124    | 0.84      | 0.53          | 1.34  | .467                  | 2207     | 124    | 0.69      | 0.44          | 1.08  | .107                  |
| 21                | 2192     | 124    | 1.45      | 1.01          | 2.08  | .045                  | 2205     | 124    | 1.39      | 0.97          | 1.99  | .074                  |
| 22                | 2199     | 123    | 1.45      | 0.86          | 2.46  | .166                  | 2208     | 124    | 2.47      | 1.57          | 3.88  | .000                  |
| 23*               | 2200     | 124    | 4.44      | 2.54          | 7.76  | .000                  | 2210     | 124    | 3.89      | 2.17          | 6.96  | .000                  |
| 24                | 2198     | 124    | 1.55      | 0.98          | 2.46  | .059                  | 2210     | 124    | 1.86      | 1.21          | 2.85  | .005                  |

| Item <sup>1</sup> | Sample 1 |        |           |               |       |                       | Sample 2 |        |           |               |       |                       |
|-------------------|----------|--------|-----------|---------------|-------|-----------------------|----------|--------|-----------|---------------|-------|-----------------------|
|                   | <i>N</i> | Deaths | <i>HR</i> | 95% <i>CI</i> |       | <i>p</i> <sup>2</sup> | <i>N</i> | Deaths | <i>HR</i> | 95% <i>CI</i> |       | <i>p</i> <sup>2</sup> |
|                   |          |        |           | Lower         | Upper |                       |          |        |           | Lower         | Upper |                       |
| 25                | 2200     | 124    | 0.98      | 0.66          | 1.45  | .925                  | 2208     | 123    | 1.19      | 0.82          | 1.74  | .365                  |
| 26                | 2187     | 122    | 1.42      | 0.99          | 2.03  | .059                  | 2204     | 124    | 1.40      | 0.98          | 1.99  | .067                  |
| 27                | 2198     | 124    | 1.96      | 1.07          | 3.59  | .028                  | 2208     | 124    | 1.91      | 1.02          | 3.57  | .044                  |
| 28*               | 2199     | 124    | 1.66      | 1.17          | 2.38  | .005                  | 2205     | 123    | 1.99      | 1.40          | 2.84  | .000                  |
| 29                | 2199     | 124    | 1.31      | 0.87          | 1.97  | .195                  | 2208     | 122    | 1.38      | 0.92          | 2.07  | .118                  |
| 30                | 2198     | 124    | 1.65      | 1.00          | 2.74  | .051                  | 2208     | 122    | 1.15      | 0.71          | 1.87  | .562                  |
| 31*               | 2200     | 123    | 2.19      | 1.42          | 3.37  | .000                  | 2209     | 124    | 2.89      | 1.96          | 4.25  | .000                  |
| 32                | 2200     | 124    | 1.77      | 1.20          | 2.64  | .004                  | 2207     | 123    | 1.47      | 0.97          | 2.24  | .071                  |
| 33                | 2197     | 124    | 1.57      | 1.08          | 2.27  | .017                  | 2208     | 123    | 2.01      | 1.40          | 2.90  | .000                  |
| 34*               | 2197     | 124    | 2.82      | 1.90          | 4.19  | .000                  | 2201     | 123    | 2.70      | 1.80          | 4.06  | .000                  |
| 35*               | 2200     | 124    | 2.19      | 1.26          | 3.83  | .006                  | 2208     | 123    | 2.28      | 1.35          | 3.86  | .002                  |
| 36                | 2200     | 124    | 0.68      | 0.47          | 0.96  | .030                  | 2207     | 123    | 0.71      | 0.50          | 1.01  | .056                  |
| 37                | 2196     | 124    | 1.00      | 0.62          | 1.61  | .985                  | 2205     | 121    | 0.53      | 0.35          | 0.80  | .003                  |

| Item <sup>1</sup> | Sample 1 |        |           |               |       |                       | Sample 2 |        |           |               |       |                       |
|-------------------|----------|--------|-----------|---------------|-------|-----------------------|----------|--------|-----------|---------------|-------|-----------------------|
|                   | <i>N</i> | Deaths | <i>HR</i> | 95% <i>CI</i> |       | <i>p</i> <sup>2</sup> | <i>N</i> | Deaths | <i>HR</i> | 95% <i>CI</i> |       | <i>p</i> <sup>2</sup> |
|                   |          |        |           | Lower         | Upper |                       |          |        |           | Lower         | Upper |                       |
| 38                | 2199     | 124    | 1.76      | 1.22          | 2.54  | .003                  | 2208     | 123    | 1.13      | 0.79          | 1.62  | .498                  |
| 39                | 2198     | 124    | 1.49      | 1.04          | 2.12  | .029                  | 2208     | 122    | 1.63      | 1.13          | 2.34  | .008                  |
| 40                | 2200     | 124    | 0.99      | 0.60          | 1.63  | .965                  | 2207     | 122    | 2.39      | 1.61          | 3.55  | .000                  |
| 41*               | 2200     | 124    | 1.93      | 1.36          | 2.76  | .000                  | 2208     | 123    | 2.00      | 1.40          | 2.86  | .000                  |
| 42                | 2197     | 123    | 1.15      | 0.65          | 2.04  | .637                  | 2206     | 124    | 0.91      | 0.48          | 1.75  | .785                  |
| 43*               | 2195     | 123    | 2.58      | 1.78          | 3.74  | .000                  | 2206     | 123    | 2.98      | 2.06          | 4.30  | .000                  |
| 44*               | 2201     | 124    | 4.07      | 2.66          | 6.22  | .000                  | 2208     | 124    | 2.97      | 1.90          | 4.66  | .000                  |
| 45                | 2200     | 124    | 1.40      | 0.97          | 2.03  | .072                  | 2209     | 123    | 1.04      | 0.73          | 1.49  | .815                  |
| 46*               | 2192     | 124    | 0.57      | 0.39          | 0.82  | .002                  | 2204     | 123    | 0.51      | 0.35          | 0.73  | .000                  |
| 47*               | 2201     | 124    | 2.75      | 1.80          | 4.19  | .000                  | 2209     | 124    | 3.52      | 2.37          | 5.25  | .000                  |
| 48*               | 2197     | 124    | 1.96      | 1.24          | 3.10  | .004                  | 2207     | 124    | 2.09      | 1.33          | 3.27  | .001                  |
| 49                | 2200     | 124    | 1.12      | 0.52          | 2.40  | .778                  | 2209     | 124    | 1.72      | 0.93          | 3.20  | .086                  |
| 50                | 2191     | 122    | 2.55      | 1.39          | 4.66  | .002                  | 2202     | 124    | 1.60      | 0.83          | 3.07  | .159                  |

| Item <sup>1</sup> | Sample 1 |        |           |               |       |                       | Sample 2 |        |           |               |       |                       |
|-------------------|----------|--------|-----------|---------------|-------|-----------------------|----------|--------|-----------|---------------|-------|-----------------------|
|                   | <i>N</i> | Deaths | <i>HR</i> | 95% <i>CI</i> |       | <i>p</i> <sup>2</sup> | <i>N</i> | Deaths | <i>HR</i> | 95% <i>CI</i> |       | <i>p</i> <sup>2</sup> |
|                   |          |        |           | Lower         | Upper |                       |          |        |           | Lower         | Upper |                       |
| 51*               | 2201     | 124    | 0.31      | 0.22          | 0.45  | .000                  | 2208     | 124    | 0.47      | 0.32          | 0.69  | .000                  |
| 52                | 2199     | 124    | 1.49      | 1.00          | 2.22  | .049                  | 2206     | 123    | 1.72      | 1.18          | 2.50  | .005                  |
| 53                | 2180     | 123    | 1.40      | 0.82          | 2.42  | .220                  | 2188     | 121    | 0.63      | 0.29          | 1.35  | .236                  |
| 54                | 2197     | 123    | 0.79      | 0.40          | 1.56  | .499                  | 2205     | 124    | 0.77      | 0.39          | 1.52  | .446                  |
| 55*               | 2200     | 124    | 0.46      | 0.32          | 0.66  | .000                  | 2208     | 123    | 0.53      | 0.37          | 0.76  | .001                  |
| 56                | 2198     | 124    | 1.62      | 1.11          | 2.36  | .013                  | 2208     | 124    | 2.16      | 1.50          | 3.12  | .000                  |
| 57                | 2181     | 120    | 1.18      | 0.79          | 1.74  | .418                  | 2203     | 122    | 0.59      | 0.41          | 0.84  | .004                  |
| 58                | 2112     | 123    | 1.33      | 0.93          | 1.92  | .122                  | 2131     | 118    | 0.88      | 0.61          | 1.27  | .492                  |
| 59                | 2197     | 123    | 1.40      | 0.93          | 2.09  | .106                  | 2208     | 124    | 1.38      | 0.91          | 2.09  | .126                  |
| 60                | 2187     | 122    | 0.55      | 0.29          | 1.03  | .062                  | 2201     | 124    | 0.72      | 0.32          | 1.64  | .430                  |
| 61*               | 2194     | 124    | 1.65      | 1.14          | 2.38  | .007                  | 2202     | 124    | 1.67      | 1.16          | 2.41  | .006                  |
| 62*               | 2201     | 124    | 2.15      | 1.50          | 3.07  | .000                  | 2210     | 124    | 2.38      | 1.67          | 3.39  | .000                  |
| 63                | 2199     | 124    | 0.71      | 0.46          | 1.11  | .134                  | 2208     | 124    | 0.62      | 0.40          | 0.94  | .026                  |

| Item <sup>1</sup> | Sample 1 |        |           |               |       |                       | Sample 2 |        |            |               |       |                       |
|-------------------|----------|--------|-----------|---------------|-------|-----------------------|----------|--------|------------|---------------|-------|-----------------------|
|                   | <i>N</i> | Deaths | <i>HR</i> | 95% <i>CI</i> |       | <i>p</i> <sup>2</sup> | <i>N</i> | Deaths | <i>HR</i>  | 95% <i>CI</i> |       | <i>p</i> <sup>2</sup> |
|                   |          |        |           | Lower         | Upper |                       |          |        |            | Lower         | Upper |                       |
| 64                | 2196     | 123    | 1.43      | 1.00          | 2.04  | .051                  | 2204     | 124    | 1.46       | 1.02          | 2.07  | .036                  |
| 65                | 2175     | 122    | 0.83      | 0.45          | 1.54  | .557                  | 2196     | 122    | 0.73       | 0.42          | 1.25  | .247                  |
| 66                | 2197     | 124    | 1.37      | 0.86          | 2.17  | .187                  | 2207     | 124    | 1.28       | 0.80          | 2.05  | .301                  |
| 67                | 2194     | 124    | 1.29      | 0.91          | 1.85  | .154                  | 2201     | 124    | 1.60       | 1.12          | 2.28  | .009                  |
| 68                | 2198     | 123    | 0.47      | 0.33          | 0.67  | .000                  | 2210     | 124    | 0.74       | 0.51          | 1.06  | .098                  |
| 69                | 2194     | 124    | 2.12      | 1.16          | 3.88  | .015                  | 2207     | 124    | 1.74       | 0.91          | 3.34  | .096                  |
| 70                | 2045     | 119    | 1.32      | 0.80          | 2.16  | .273                  | 2022     | 114    | 0.74       | 0.40          | 1.39  | .355                  |
| 71                | 2195     | 124    | 1.77      | 1.13          | 2.77  | .012                  | 2202     | 123    | 1.16       | 0.77          | 1.75  | .476                  |
| 72*               | 2201     | 124    | 1.81      | 1.16          | 2.83  | .009                  | 2208     | 123    | 1.93       | 1.26          | 2.95  | .002                  |
| 73                | 2190     | 123    | 0.70      | 0.49          | 1.02  | .064                  | 2204     | 123    | 0.75       | 0.51          | 1.10  | .137                  |
| 74                | 2200     | 124    | 1.52      | 0.48          | 4.79  | .477                  | 2210     | 124    | 1.09       | 0.27          | 4.41  | .908                  |
| 75                | 2201     | 124    | 0.44      | 0.21          | 0.89  | .024                  | 2209     | 124    | 9990000.00 | 0.00          | ∞     | .992                  |
| 76*               | 2197     | 124    | 2.26      | 1.50          | 3.40  | .000                  | 2210     | 124    | 2.33       | 1.55          | 3.51  | .000                  |

| Sample 1          |          |        |           |               |       |                       | Sample 2 |        |           |               |       |                       |
|-------------------|----------|--------|-----------|---------------|-------|-----------------------|----------|--------|-----------|---------------|-------|-----------------------|
| Item <sup>1</sup> | <i>N</i> | Deaths | <i>HR</i> | 95% <i>CI</i> |       | <i>p</i> <sup>2</sup> | <i>N</i> | Deaths | <i>HR</i> | 95% <i>CI</i> |       | <i>p</i> <sup>2</sup> |
|                   |          |        |           | Lower         | Upper |                       |          |        |           | Lower         | Upper |                       |
| 77                | 2197     | 124    | 0.75      | 0.45          | 1.27  | .287                  | 2205     | 124    | 1.10      | 0.69          | 1.74  | .684                  |
| 78                | 2198     | 124    | 0.90      | 0.62          | 1.31  | .584                  | 2203     | 124    | 0.89      | 0.61          | 1.29  | .538                  |
| 79                | 2199     | 124    | 0.84      | 0.59          | 1.19  | .321                  | 2210     | 124    | 0.59      | 0.41          | 0.84  | .004                  |
| 80                | 2200     | 124    | 1.44      | 0.99          | 2.09  | .056                  | 2207     | 124    | 0.88      | 0.58          | 1.34  | .554                  |
| 81                | 2201     | 124    | 1.06      | 0.72          | 1.55  | .775                  | 2209     | 124    | 1.15      | 0.77          | 1.71  | .503                  |
| 82                | 2197     | 124    | 1.29      | 0.84          | 1.96  | .242                  | 2203     | 124    | 0.88      | 0.55          | 1.42  | .602                  |
| 83                | 2200     | 124    | 0.62      | 0.34          | 1.16  | .136                  | 2208     | 123    | 0.89      | 0.43          | 1.82  | .750                  |
| 84                | 2190     | 123    | 1.15      | 0.80          | 1.65  | .444                  | 2203     | 124    | 1.42      | 0.99          | 2.03  | .056                  |
| 85                | 2198     | 124    | 6.66      | 3.08          | 14.43 | .000                  | 2207     | 124    | 2.18      | 0.79          | 5.98  | .131                  |
| 86                | 2197     | 124    | 1.37      | 0.92          | 2.03  | .118                  | 2208     | 124    | 1.41      | 0.96          | 2.08  | .081                  |
| 87                | 2198     | 124    | 1.78      | 0.98          | 3.23  | .059                  | 2207     | 123    | 1.26      | 0.64          | 2.49  | .504                  |
| 88                | 2199     | 124    | 0.57      | 0.29          | 1.13  | .108                  | 2206     | 124    | 0.43      | 0.24          | 0.78  | .006                  |
| 89                | 2190     | 124    | 2.21      | 1.53          | 3.21  | .000                  | 2206     | 124    | 1.11      | 0.77          | 1.59  | .584                  |



| Item <sup>1</sup> | Sample 1 |        |           |               |       |                       | Sample 2 |        |           |               |       |                       |
|-------------------|----------|--------|-----------|---------------|-------|-----------------------|----------|--------|-----------|---------------|-------|-----------------------|
|                   | <i>N</i> | Deaths | <i>HR</i> | 95% <i>CI</i> |       | <i>p</i> <sup>2</sup> | <i>N</i> | Deaths | <i>HR</i> | 95% <i>CI</i> |       | <i>p</i> <sup>2</sup> |
|                   |          |        |           | Lower         | Upper |                       |          |        |           | Lower         | Upper |                       |
| 90                | 2200     | 124    | 0.72      | 0.41          | 1.26  | .252                  | 2208     | 124    | 1.25      | 0.61          | 2.57  | .542                  |
| 91                | 2198     | 124    | 0.86      | 0.60          | 1.24  | .415                  | 2209     | 124    | 0.86      | 0.60          | 1.24  | .414                  |
| 92                | 2201     | 124    | 2.31      | 1.21          | 4.40  | .012                  | 2210     | 124    | 0.95      | 0.39          | 2.32  | .907                  |
| 93                | 2200     | 124    | 1.85      | 1.23          | 2.78  | .003                  | 2206     | 124    | 1.49      | 1.00          | 2.22  | .052                  |
| 94                | 2199     | 124    | 1.46      | 1.00          | 2.12  | .052                  | 2209     | 124    | 2.70      | 1.89          | 3.86  | .000                  |
| 95*               | 2200     | 124    | 0.46      | 0.28          | 0.77  | .003                  | 2210     | 124    | 0.34      | 0.19          | 0.61  | .000                  |
| 96                | 2199     | 124    | 0.78      | 0.53          | 1.16  | .225                  | 2207     | 123    | 0.82      | 0.55          | 1.22  | .331                  |
| 97                | 2201     | 124    | 1.21      | 0.78          | 1.88  | .397                  | 2206     | 123    | 1.74      | 1.17          | 2.59  | .006                  |
| 98                | 2166     | 121    | 1.02      | 0.68          | 1.52  | .937                  | 2169     | 121    | 0.82      | 0.56          | 1.20  | .314                  |
| 99                | 2197     | 123    | 1.45      | 1.01          | 2.06  | .042                  | 2209     | 124    | 1.16      | 0.81          | 1.65  | .414                  |
| 100               | 2192     | 124    | 1.89      | 1.31          | 2.73  | .001                  | 2195     | 124    | 1.50      | 1.05          | 2.15  | .027                  |
| 101               | 2191     | 122    | 1.15      | 0.72          | 1.84  | .560                  | 2202     | 124    | 1.05      | 0.65          | 1.69  | .839                  |
| 102               | 2196     | 124    | 1.27      | 0.85          | 1.91  | .243                  | 2208     | 124    | 1.71      | 1.10          | 2.65  | .017                  |

| Sample 1          |          |        |           |               |       |                       | Sample 2 |        |           |               |       |                       |
|-------------------|----------|--------|-----------|---------------|-------|-----------------------|----------|--------|-----------|---------------|-------|-----------------------|
| Item <sup>1</sup> | <i>N</i> | Deaths | <i>HR</i> | 95% <i>CI</i> |       | <i>p</i> <sup>2</sup> | <i>N</i> | Deaths | <i>HR</i> | 95% <i>CI</i> |       | <i>p</i> <sup>2</sup> |
|                   |          |        |           | Lower         | Upper |                       |          |        |           | Lower         | Upper |                       |
| 103*              | 2200     | 124    | 0.38      | 0.26          | 0.55  | .000                  | 2210     | 124    | 0.52      | 0.35          | 0.77  | .001                  |
| 104               | 2200     | 124    | 1.34      | 0.76          | 2.34  | .311                  | 2209     | 124    | 2.02      | 1.24          | 3.28  | .004                  |
| 105               | 2196     | 123    | 1.55      | 1.00          | 2.40  | .050                  | 2207     | 122    | 1.39      | 0.90          | 2.16  | .140                  |
| 106               | 2200     | 124    | 2.61      | 1.70          | 3.99  | .000                  | 2208     | 123    | 1.86      | 1.15          | 3.01  | .011                  |
| 107               | 2197     | 124    | 0.86      | 0.52          | 1.42  | .554                  | 2207     | 124    | 0.39      | 0.26          | 0.58  | .000                  |
| 108               | 2193     | 124    | 1.83      | 1.20          | 2.77  | .005                  | 2202     | 123    | 1.42      | 0.92          | 2.18  | .116                  |
| 109               | 2200     | 124    | 1.20      | 0.83          | 1.74  | .340                  | 2210     | 124    | 1.73      | 1.21          | 2.48  | .002                  |
| 110*              | 2196     | 123    | 2.13      | 1.27          | 3.58  | .004                  | 2208     | 124    | 2.27      | 1.41          | 3.66  | .001                  |
| 111               | 2200     | 124    | 0.96      | 0.65          | 1.41  | .820                  | 2210     | 124    | 0.87      | 0.59          | 1.31  | .513                  |
| 112               | 2198     | 124    | 1.18      | 0.77          | 1.81  | .460                  | 2209     | 124    | 1.29      | 0.83          | 2.00  | .258                  |
| 113               | 2199     | 124    | 0.57      | 0.21          | 1.56  | .274                  | 2209     | 124    | 0.41      | 0.18          | 0.93  | .034                  |
| 114*              | 2200     | 124    | 2.38      | 1.48          | 3.82  | .000                  | 2210     | 124    | 2.13      | 1.34          | 3.40  | .001                  |
| 115               | 2173     | 121    | 0.71      | 0.48          | 1.05  | .087                  | 2186     | 123    | 0.61      | 0.42          | 0.89  | .010                  |

| Sample 1          |          |        |           |               |       |                       | Sample 2 |        |           |               |       |                       |
|-------------------|----------|--------|-----------|---------------|-------|-----------------------|----------|--------|-----------|---------------|-------|-----------------------|
| Item <sup>1</sup> | <i>N</i> | Deaths | <i>HR</i> | 95% <i>CI</i> |       | <i>p</i> <sup>2</sup> | <i>N</i> | Deaths | <i>HR</i> | 95% <i>CI</i> |       | <i>p</i> <sup>2</sup> |
|                   |          |        |           | Lower         | Upper |                       |          |        |           | Lower         | Upper |                       |
| 116               | 2200     | 124    | 1.49      | 1.04          | 2.14  | .029                  | 2208     | 123    | 1.81      | 1.27          | 2.59  | .001                  |
| 117               | 2196     | 124    | 1.89      | 1.29          | 2.77  | .001                  | 2206     | 124    | 1.42      | 0.98          | 2.05  | .061                  |
| 118               | 2196     | 124    | 1.56      | 1.10          | 2.23  | .013                  | 2208     | 123    | 1.56      | 1.09          | 2.23  | .014                  |
| 119               | 2198     | 124    | 0.82      | 0.55          | 1.21  | .314                  | 2208     | 123    | 0.74      | 0.50          | 1.09  | .130                  |
| 120               | 2197     | 124    | 1.45      | 0.98          | 2.15  | .064                  | 2208     | 123    | 0.73      | 0.51          | 1.04  | .081                  |
| 121               | 2199     | 124    | 3.76      | 2.09          | 6.75  | .000                  | 2209     | 123    | 1.53      | 0.81          | 2.88  | .187                  |
| 122               | 2198     | 124    | 0.80      | 0.46          | 1.40  | .439                  | 2209     | 124    | 0.55      | 0.32          | 0.94  | .030                  |
| 123               | 2201     | 124    | 2.88      | 1.26          | 6.60  | .013                  | 2210     | 124    | 1.77      | 0.77          | 4.07  | .178                  |
| 124               | 2195     | 123    | 1.30      | 0.87          | 1.96  | .200                  | 2203     | 123    | 1.43      | 0.94          | 2.18  | .090                  |
| 125               | 2200     | 124    | 1.70      | 1.07          | 2.70  | .024                  | 2209     | 124    | 1.57      | 0.98          | 2.49  | .059                  |
| 126               | 2192     | 124    | 1.42      | 0.99          | 2.03  | .055                  | 2207     | 124    | 1.08      | 0.75          | 1.55  | .673                  |
| 127               | 2174     | 123    | 1.11      | 0.76          | 1.63  | .576                  | 2189     | 124    | 1.06      | 0.73          | 1.53  | .774                  |
| 128               | 2200     | 124    | 1.21      | 0.80          | 1.83  | .373                  | 2209     | 124    | 1.14      | 0.75          | 1.74  | .528                  |

| Item <sup>1</sup> | Sample 1 |        |           |               |       |                       | Sample 2 |        |           |               |       |                       |
|-------------------|----------|--------|-----------|---------------|-------|-----------------------|----------|--------|-----------|---------------|-------|-----------------------|
|                   | <i>N</i> | Deaths | <i>HR</i> | 95% <i>CI</i> |       | <i>p</i> <sup>2</sup> | <i>N</i> | Deaths | <i>HR</i> | 95% <i>CI</i> |       | <i>p</i> <sup>2</sup> |
|                   |          |        |           | Lower         | Upper |                       |          |        |           | Lower         | Upper |                       |
| 129               | 2192     | 124    | 1.46      | 1.03          | 2.08  | .036                  | 2198     | 123    | 1.46      | 1.02          | 2.08  | .037                  |
| 130               | 2200     | 123    | 0.58      | 0.39          | 0.86  | .007                  | 2210     | 124    | 0.84      | 0.55          | 1.29  | .431                  |
| 131               | 2200     | 124    | 0.56      | 0.38          | 0.82  | .003                  | 2210     | 124    | 0.83      | 0.58          | 1.19  | .318                  |
| 132               | 2199     | 123    | 1.48      | 1.04          | 2.13  | .032                  | 2209     | 124    | 0.96      | 0.66          | 1.40  | .831                  |
| 133               | 2196     | 124    | 0.72      | 0.50          | 1.05  | .090                  | 2205     | 124    | 0.76      | 0.53          | 1.11  | .158                  |
| 134               | 2199     | 124    | 1.35      | 0.86          | 2.10  | .192                  | 2210     | 124    | 1.46      | 0.91          | 2.33  | .116                  |
| 135               | 2198     | 123    | 1.62      | 1.13          | 2.33  | .009                  | 2209     | 124    | 1.29      | 0.90          | 1.86  | .167                  |
| 136               | 2200     | 124    | 1.83      | 1.28          | 2.63  | .001                  | 2209     | 124    | 1.58      | 1.10          | 2.25  | .013                  |
| 137               | 2198     | 124    | 0.84      | 0.52          | 1.34  | .456                  | 2208     | 124    | 0.58      | 0.38          | 0.89  | .013                  |
| 138               | 2200     | 123    | 1.30      | 0.91          | 1.86  | .149                  | 2209     | 124    | 1.44      | 1.01          | 2.05  | .046                  |
| 139*              | 2200     | 124    | 2.00      | 1.21          | 3.31  | .007                  | 2208     | 124    | 2.37      | 1.49          | 3.75  | .000                  |
| 140               | 2198     | 124    | 1.04      | 0.72          | 1.51  | .817                  | 2208     | 124    | 1.13      | 0.78          | 1.65  | .507                  |
| 141               | 2198     | 124    | 1.11      | 0.78          | 1.59  | .545                  | 2203     | 124    | 1.27      | 0.89          | 1.81  | .181                  |

| Sample 1          |          |        |           |               |       |                       | Sample 2 |        |           |               |       |                       |
|-------------------|----------|--------|-----------|---------------|-------|-----------------------|----------|--------|-----------|---------------|-------|-----------------------|
| Item <sup>1</sup> | <i>N</i> | Deaths | <i>HR</i> | 95% <i>CI</i> |       | <i>p</i> <sup>2</sup> | <i>N</i> | Deaths | <i>HR</i> | 95% <i>CI</i> |       | <i>p</i> <sup>2</sup> |
|                   |          |        |           | Lower         | Upper |                       |          |        |           | Lower         | Upper |                       |
| 142*              | 2201     | 124    | 1.60      | 1.12          | 2.27  | .009                  | 2210     | 124    | 2.13      | 1.49          | 3.03  | .000                  |
| 143*              | 2197     | 124    | 1.83      | 1.28          | 2.61  | .001                  | 2207     | 124    | 1.90      | 1.33          | 2.72  | .000                  |
| 144               | 2195     | 124    | 1.29      | 0.86          | 1.93  | .224                  | 2207     | 124    | 0.95      | 0.60          | 1.51  | .825                  |
| 145               | 2200     | 124    | 1.53      | 1.00          | 2.34  | .049                  | 2208     | 124    | 1.90      | 1.29          | 2.81  | .001                  |
| 146*              | 2192     | 123    | 2.26      | 1.49          | 3.41  | .000                  | 2210     | 124    | 1.86      | 1.22          | 2.82  | .004                  |
| 147               | 2200     | 124    | 1.62      | 1.13          | 2.31  | .008                  | 2209     | 124    | 1.52      | 1.07          | 2.17  | .020                  |
| 148               | 2199     | 124    | 1.68      | 1.18          | 2.39  | .004                  | 2208     | 123    | 1.43      | 1.01          | 2.04  | .047                  |
| 149               | 2199     | 124    | 0.80      | 0.35          | 1.81  | .586                  | 2209     | 124    | 1.02      | 0.50          | 2.08  | .967                  |
| 150               | 2198     | 123    | 0.83      | 0.50          | 1.38  | .467                  | 2207     | 124    | 1.08      | 0.61          | 1.93  | .783                  |
| 151               | 2201     | 124    | 2.58      | 0.64          | 10.48 | .184                  | 2209     | 124    | 1.09      | 0.15          | 7.82  | .933                  |
| 152*              | 2198     | 124    | 0.60      | 0.42          | 0.85  | .004                  | 2209     | 124    | 0.57      | 0.40          | 0.82  | .002                  |
| 153*              | 2200     | 124    | 0.27      | 0.18          | 0.41  | .000                  | 2208     | 124    | 0.31      | 0.21          | 0.47  | .000                  |
| 154*              | 2201     | 124    | 0.35      | 0.22          | 0.55  | .000                  | 2208     | 123    | 0.34      | 0.22          | 0.54  | .000                  |

| Item <sup>1</sup> | Sample 1 |        |           |               |       |                       | Sample 2 |        |           |               |       |                       |
|-------------------|----------|--------|-----------|---------------|-------|-----------------------|----------|--------|-----------|---------------|-------|-----------------------|
|                   | <i>N</i> | Deaths | <i>HR</i> | 95% <i>CI</i> |       | <i>p</i> <sup>2</sup> | <i>N</i> | Deaths | <i>HR</i> | 95% <i>CI</i> |       | <i>p</i> <sup>2</sup> |
|                   |          |        |           | Lower         | Upper |                       |          |        |           | Lower         | Upper |                       |
| 155               | 2200     | 124    | 1.05      | 0.72          | 1.52  | .809                  | 2210     | 124    | 0.65      | 0.46          | 0.93  | .019                  |
| 156               | 2201     | 124    | 1.61      | 1.03          | 2.52  | .035                  | 2206     | 124    | 2.29      | 1.53          | 3.42  | .000                  |
| 157*              | 2199     | 124    | 2.10      | 1.37          | 3.22  | .001                  | 2209     | 124    | 2.60      | 1.76          | 3.84  | .000                  |
| 158*              | 2200     | 124    | 1.76      | 1.17          | 2.65  | .007                  | 2210     | 124    | 1.69      | 1.14          | 2.53  | .010                  |
| 159*              | 2199     | 124    | 1.72      | 1.19          | 2.51  | .004                  | 2210     | 124    | 1.64      | 1.13          | 2.38  | .009                  |
| 160               | 2194     | 123    | 0.60      | 0.41          | 0.87  | .008                  | 2203     | 123    | 0.67      | 0.46          | 0.97  | .036                  |
| 161               | 2200     | 124    | 1.53      | 0.98          | 2.40  | .060                  | 2210     | 124    | 1.81      | 1.19          | 2.74  | .005                  |
| 162               | 2188     | 123    | 1.15      | 0.80          | 1.64  | .450                  | 2200     | 123    | 1.35      | 0.95          | 1.92  | .098                  |
| 163*              | 2201     | 124    | 0.40      | 0.28          | 0.57  | .000                  | 2209     | 124    | 0.48      | 0.33          | 0.68  | .000                  |
| 164               | 2199     | 124    | 1.15      | 0.71          | 1.85  | .576                  | 2208     | 123    | 0.66      | 0.43          | 1.01  | .054                  |
| 165               | 2199     | 124    | 1.41      | 0.99          | 2.01  | .056                  | 2209     | 124    | 1.10      | 0.77          | 1.57  | .618                  |
| 166               | 2201     | 124    | 1.12      | 0.79          | 1.60  | .527                  | 2207     | 122    | 1.42      | 0.99          | 2.03  | .054                  |
| 167               | 2200     | 124    | 0.81      | 0.53          | 1.24  | .336                  | 2208     | 124    | 1.16      | 0.78          | 1.72  | .469                  |

| Item <sup>1</sup> | Sample 1 |        |           |               |       |                       | Sample 2 |        |           |               |       |                       |
|-------------------|----------|--------|-----------|---------------|-------|-----------------------|----------|--------|-----------|---------------|-------|-----------------------|
|                   | <i>N</i> | Deaths | <i>HR</i> | 95% <i>CI</i> |       | <i>p</i> <sup>2</sup> | <i>N</i> | Deaths | <i>HR</i> | 95% <i>CI</i> |       | <i>p</i> <sup>2</sup> |
|                   |          |        |           | Lower         | Upper |                       |          |        |           | Lower         | Upper |                       |
| 168*              | 2193     | 124    | 2.63      | 1.72          | 4.00  | .000                  | 2205     | 124    | 3.03      | 2.01          | 4.58  | .000                  |
| 169               | 2199     | 124    | 0.78      | 0.42          | 1.44  | .421                  | 2210     | 124    | 0.72      | 0.38          | 1.38  | .328                  |
| 170               | 2199     | 124    | 1.23      | 0.86          | 1.76  | .259                  | 2209     | 124    | 1.24      | 0.87          | 1.78  | .240                  |
| 171               | 2185     | 122    | 1.14      | 0.79          | 1.65  | .479                  | 2192     | 124    | 1.32      | 0.92          | 1.91  | .134                  |
| 172               | 2196     | 123    | 1.28      | 0.90          | 1.82  | .178                  | 2207     | 124    | 1.15      | 0.81          | 1.64  | .431                  |
| 173               | 2199     | 124    | 0.65      | 0.45          | 0.93  | .017                  | 2208     | 124    | 0.53      | 0.37          | 0.76  | .001                  |
| 174               | 2201     | 124    | 0.75      | 0.51          | 1.12  | .161                  | 2208     | 124    | 0.76      | 0.52          | 1.13  | .180                  |
| 175*              | 2199     | 123    | 0.54      | 0.35          | 0.81  | .003                  | 2210     | 124    | 0.53      | 0.35          | 0.79  | .002                  |
| 176               | 2199     | 124    | 0.97      | 0.68          | 1.39  | .874                  | 2209     | 123    | 0.95      | 0.66          | 1.36  | .769                  |
| 177               | 2196     | 124    | 0.62      | 0.25          | 1.51  | .292                  | 2204     | 123    | 0.68      | 0.30          | 1.55  | .361                  |
| 178               | 2200     | 123    | 0.62      | 0.41          | 0.93  | .021                  | 2209     | 124    | 0.53      | 0.36          | 0.77  | .001                  |
| 179               | 2199     | 124    | 1.03      | 0.63          | 1.68  | .912                  | 2209     | 124    | 1.58      | 1.03          | 2.40  | .034                  |
| 180               | 2198     | 123    | 1.11      | 0.78          | 1.59  | .555                  | 2209     | 124    | 1.72      | 1.20          | 2.46  | .003                  |

| Sample 1          |          |        |           |               |       |                       | Sample 2 |        |           |               |       |                       |
|-------------------|----------|--------|-----------|---------------|-------|-----------------------|----------|--------|-----------|---------------|-------|-----------------------|
| Item <sup>1</sup> | <i>N</i> | Deaths | <i>HR</i> | 95% <i>CI</i> |       | <i>p</i> <sup>2</sup> | <i>N</i> | Deaths | <i>HR</i> | 95% <i>CI</i> |       | <i>p</i> <sup>2</sup> |
|                   |          |        |           | Lower         | Upper |                       |          |        |           | Lower         | Upper |                       |
| 181               | 2197     | 123    | 1.48      | 1.04          | 2.11  | .030                  | 2207     | 124    | 1.25      | 0.88          | 1.79  | .212                  |
| 182*              | 2200     | 124    | 2.64      | 1.78          | 3.92  | .000                  | 2209     | 124    | 2.83      | 1.92          | 4.17  | .000                  |
| 183               | 2195     | 124    | 0.76      | 0.52          | 1.10  | .144                  | 2208     | 124    | 1.19      | 0.84          | 1.70  | .329                  |
| 184               | 2199     | 124    | 1.97      | 0.99          | 3.94  | .054                  | 2207     | 124    | 4.00      | 2.38          | 6.73  | .000                  |
| 185               | 2200     | 124    | 1.20      | 0.74          | 1.94  | .457                  | 2209     | 124    | 0.77      | 0.51          | 1.16  | .209                  |
| 186*              | 2200     | 124    | 1.72      | 1.15          | 2.58  | .009                  | 2209     | 124    | 2.14      | 1.44          | 3.17  | .000                  |
| 187*              | 2198     | 124    | 0.53      | 0.34          | 0.83  | .005                  | 2209     | 124    | 0.53      | 0.34          | 0.82  | .004                  |
| 188               | 2201     | 124    | 0.62      | 0.43          | 0.88  | .009                  | 2210     | 124    | 0.79      | 0.55          | 1.13  | .200                  |
| 189               | 2201     | 124    | 3.19      | 2.06          | 4.93  | .000                  | 2209     | 124    | 1.75      | 1.05          | 2.93  | .032                  |
| 190               | 2199     | 124    | 0.61      | 0.41          | 0.89  | .011                  | 2208     | 124    | 0.57      | 0.39          | 0.83  | .004                  |
| 191               | 2197     | 124    | 1.19      | 0.82          | 1.72  | .352                  | 2209     | 124    | 1.50      | 1.05          | 2.15  | .026                  |
| 192               | 2200     | 124    | 0.60      | 0.36          | 0.99  | .046                  | 2210     | 124    | 0.39      | 0.25          | 0.62  | .000                  |
| 193               | 2200     | 124    | 1.14      | 0.72          | 1.81  | .580                  | 2210     | 124    | 0.83      | 0.55          | 1.26  | .385                  |



| Item <sup>1</sup> | Sample 1 |        |           |               |       |                       | Sample 2 |        |           |               |       |                       |
|-------------------|----------|--------|-----------|---------------|-------|-----------------------|----------|--------|-----------|---------------|-------|-----------------------|
|                   | <i>N</i> | Deaths | <i>HR</i> | 95% <i>CI</i> |       | <i>p</i> <sup>2</sup> | <i>N</i> | Deaths | <i>HR</i> | 95% <i>CI</i> |       | <i>p</i> <sup>2</sup> |
|                   |          |        |           | Lower         | Upper |                       |          |        |           | Lower         | Upper |                       |
| 194               | 2197     | 124    | 1.65      | 0.91          | 3.01  | .101                  | 2210     | 124    | 2.57      | 1.58          | 4.20  | .000                  |
| 195               | 2200     | 123    | 1.52      | 0.89          | 2.58  | .124                  | 2208     | 124    | 2.31      | 1.17          | 4.57  | .016                  |
| 196               | 2201     | 124    | 1.41      | 0.57          | 3.44  | .456                  | 2210     | 124    | 0.85      | 0.39          | 1.82  | .668                  |
| 197               | 2201     | 124    | 1.85      | 0.81          | 4.22  | .145                  | 2209     | 124    | 2.97      | 1.59          | 5.55  | .001                  |
| 198               | 2201     | 124    | 0.63      | 0.44          | 0.90  | .010                  | 2209     | 124    | 0.74      | 0.52          | 1.05  | .088                  |
| 199               | 2195     | 123    | 0.89      | 0.60          | 1.32  | .550                  | 2203     | 124    | 0.81      | 0.54          | 1.21  | .308                  |
| 200               | 2201     | 124    | 2.10      | 1.12          | 3.95  | .021                  | 2209     | 124    | 1.69      | 0.87          | 3.26  | .120                  |
| 201               | 2196     | 124    | 1.45      | 1.01          | 2.08  | .043                  | 2204     | 124    | 1.19      | 0.84          | 1.71  | .328                  |
| 202               | 2200     | 124    | 1.93      | 0.94          | 3.98  | .074                  | 2208     | 124    | 2.86      | 1.66          | 4.95  | .000                  |
| 203               | 2197     | 123    | 1.33      | 0.82          | 2.13  | .245                  | 2208     | 124    | 1.02      | 0.62          | 1.68  | .945                  |
| 204               | 2200     | 123    | 1.22      | 0.80          | 1.86  | .360                  | 2209     | 124    | 0.96      | 0.63          | 1.47  | .848                  |
| 205               | 2199     | 124    | 3.18      | 1.79          | 5.67  | .000                  | 2210     | 124    | 2.07      | 1.08          | 3.96  | .029                  |
| 206               | 2193     | 123    | 0.83      | 0.51          | 1.34  | .451                  | 2206     | 124    | 0.85      | 0.52          | 1.38  | .501                  |

| Sample 1          |          |        |           |               |       |                       | Sample 2 |        |           |               |       |                       |
|-------------------|----------|--------|-----------|---------------|-------|-----------------------|----------|--------|-----------|---------------|-------|-----------------------|
| Item <sup>1</sup> | <i>N</i> | Deaths | <i>HR</i> | 95% <i>CI</i> |       | <i>p</i> <sup>2</sup> | <i>N</i> | Deaths | <i>HR</i> | 95% <i>CI</i> |       | <i>p</i> <sup>2</sup> |
|                   |          |        |           | Lower         | Upper |                       |          |        |           | Lower         | Upper |                       |
| 207               | 2200     | 124    | 0.66      | 0.44          | 1.00  | .049                  | 2209     | 124    | 0.52      | 0.35          | 0.78  | .002                  |
| 208               | 2193     | 124    | 1.32      | 0.91          | 1.93  | .142                  | 2208     | 124    | 1.15      | 0.80          | 1.67  | .447                  |
| 209               | 2186     | 123    | 1.15      | 0.56          | 2.37  | .698                  | 2199     | 122    | 2.60      | 1.53          | 4.42  | .000                  |
| 210               | 2198     | 124    | 2.66      | 1.08          | 6.55  | .033                  | 2210     | 124    | 0.58      | 0.08          | 4.17  | .588                  |
| 211               | 2200     | 124    | 1.68      | 0.85          | 3.31  | .137                  | 2209     | 124    | 2.83      | 1.71          | 4.70  | .000                  |
| 212               | 2198     | 124    | 1.14      | 0.53          | 2.46  | .729                  | 2210     | 124    | 2.10      | 1.15          | 3.83  | .016                  |
| 213               | 2199     | 124    | 1.24      | 0.72          | 2.12  | .442                  | 2209     | 124    | 0.82      | 0.44          | 1.51  | .518                  |
| 214               | 2201     | 124    | 0.71      | 0.50          | 1.01  | .060                  | 2210     | 124    | 1.06      | 0.75          | 1.51  | .731                  |
| 215*              | 2200     | 124    | 1.69      | 1.19          | 2.41  | .004                  | 2208     | 124    | 1.99      | 1.38          | 2.85  | .000                  |
| 216               | 2201     | 124    | 1.47      | 0.89          | 2.42  | .133                  | 2207     | 124    | 1.81      | 1.15          | 2.86  | .010                  |
| 217               | 2201     | 124    | 2.01      | 1.38          | 2.92  | .000                  | 2209     | 124    | 1.44      | 1.00          | 2.06  | .047                  |
| 218               | 2200     | 124    | 1.04      | 0.53          | 2.06  | .905                  | 2210     | 124    | 0.93      | 0.47          | 1.84  | .840                  |
| 219               | 2199     | 124    | 0.96      | 0.67          | 1.37  | .825                  | 2209     | 124    | 1.28      | 0.89          | 1.85  | .189                  |

| Sample 1          |          |        |           |               |       |                       | Sample 2 |        |           |               |       |                       |
|-------------------|----------|--------|-----------|---------------|-------|-----------------------|----------|--------|-----------|---------------|-------|-----------------------|
| Item <sup>1</sup> | <i>N</i> | Deaths | <i>HR</i> | 95% <i>CI</i> |       | <i>p</i> <sup>2</sup> | <i>N</i> | Deaths | <i>HR</i> | 95% <i>CI</i> |       | <i>p</i> <sup>2</sup> |
|                   |          |        |           | Lower         | Upper |                       |          |        |           | Lower         | Upper |                       |
| 220               | 2191     | 123    | 0.97      | 0.36          | 2.64  | .957                  | 2203     | 124    | 0.92      | 0.40          | 2.08  | .835                  |
| 221               | 2199     | 124    | 0.91      | 0.60          | 1.38  | .649                  | 2210     | 124    | 0.77      | 0.52          | 1.15  | .200                  |
| 222               | 2198     | 124    | 0.64      | 0.44          | 0.94  | .022                  | 2207     | 124    | 0.75      | 0.52          | 1.08  | .127                  |
| 223               | 2195     | 123    | 1.13      | 0.79          | 1.61  | .506                  | 2208     | 124    | 1.38      | 0.97          | 1.96  | .075                  |
| 224               | 2198     | 124    | 1.50      | 1.02          | 2.20  | .041                  | 2208     | 124    | 2.78      | 1.94          | 3.97  | .000                  |
| 225               | 2198     | 124    | 0.92      | 0.61          | 1.39  | .701                  | 2209     | 124    | 1.19      | 0.76          | 1.85  | .440                  |
| 226               | 2199     | 124    | 1.65      | 1.15          | 2.36  | .006                  | 2210     | 124    | 1.27      | 0.89          | 1.80  | .190                  |
| 227               | 2200     | 124    | 0.75      | 0.31          | 1.85  | .539                  | 2210     | 124    | 1.12      | 0.57          | 2.21  | .738                  |
| 228               | 2197     | 124    | 0.97      | 0.62          | 1.50  | .884                  | 2205     | 124    | 0.54      | 0.37          | 0.80  | .002                  |
| 229               | 2197     | 124    | 1.79      | 1.24          | 2.59  | .002                  | 2207     | 124    | 1.19      | 0.80          | 1.77  | .390                  |
| 230               | 2197     | 124    | 0.48      | 0.34          | 0.68  | .000                  | 2207     | 123    | 0.65      | 0.45          | 0.94  | .023                  |
| 231               | 2195     | 124    | 1.20      | 0.84          | 1.72  | .323                  | 2207     | 124    | 1.07      | 0.75          | 1.53  | .708                  |
| 232               | 2167     | 121    | 1.12      | 0.76          | 1.65  | .574                  | 2186     | 124    | 0.88      | 0.58          | 1.32  | .535                  |

| Item <sup>1</sup> | Sample 1 |        |           |               |       |                       | Sample 2 |        |           |               |       |                       |
|-------------------|----------|--------|-----------|---------------|-------|-----------------------|----------|--------|-----------|---------------|-------|-----------------------|
|                   | <i>N</i> | Deaths | <i>HR</i> | 95% <i>CI</i> |       | <i>p</i> <sup>2</sup> | <i>N</i> | Deaths | <i>HR</i> | 95% <i>CI</i> |       | <i>p</i> <sup>2</sup> |
|                   |          |        |           | Lower         | Upper |                       |          |        |           | Lower         | Upper |                       |
| 233               | 2187     | 123    | 1.03      | 0.68          | 1.56  | .873                  | 2207     | 124    | 1.38      | 0.95          | 2.00  | .095                  |
| 234               | 2198     | 124    | 1.37      | 0.96          | 1.96  | .079                  | 2208     | 124    | 1.51      | 1.06          | 2.15  | .022                  |
| 235               | 2195     | 124    | 1.59      | 1.02          | 2.47  | .040                  | 2205     | 124    | 0.99      | 0.66          | 1.47  | .955                  |
| 236               | 2195     | 123    | 1.77      | 1.16          | 2.70  | .008                  | 2197     | 124    | 1.69      | 1.11          | 2.58  | .014                  |
| 237               | 2169     | 122    | 1.04      | 0.71          | 1.51  | .841                  | 2171     | 123    | 1.11      | 0.77          | 1.60  | .571                  |
| 238*              | 2199     | 124    | 1.84      | 1.29          | 2.62  | .001                  | 2207     | 123    | 2.01      | 1.41          | 2.87  | .000                  |
| 239               | 2193     | 123    | 1.55      | 1.07          | 2.23  | .019                  | 2208     | 124    | 1.47      | 1.03          | 2.11  | .035                  |
| 240               | 2195     | 123    | 0.84      | 0.54          | 1.30  | .424                  | 2208     | 124    | 1.15      | 0.76          | 1.74  | .498                  |
| 241               | 2199     | 124    | 1.52      | 1.06          | 2.18  | .022                  | 2208     | 124    | 1.78      | 1.24          | 2.55  | .002                  |
| 242               | 2201     | 124    | 0.70      | 0.48          | 1.02  | .066                  | 2209     | 124    | 0.75      | 0.51          | 1.11  | .146                  |
| 243*              | 2201     | 124    | 0.44      | 0.31          | 0.63  | .000                  | 2210     | 124    | 0.51      | 0.35          | 0.73  | .000                  |
| 244               | 2198     | 124    | 1.96      | 1.37          | 2.80  | .000                  | 2208     | 123    | 1.42      | 1.00          | 2.03  | .052                  |
| 245               | 2199     | 124    | 1.76      | 1.12          | 2.77  | .015                  | 2208     | 124    | 1.94      | 1.27          | 2.96  | .002                  |

| Item <sup>1</sup> | Sample 1 |        |           |               |       |                       | Sample 2 |        |           |               |       |                       |
|-------------------|----------|--------|-----------|---------------|-------|-----------------------|----------|--------|-----------|---------------|-------|-----------------------|
|                   | <i>N</i> | Deaths | <i>HR</i> | 95% <i>CI</i> |       | <i>p</i> <sup>2</sup> | <i>N</i> | Deaths | <i>HR</i> | 95% <i>CI</i> |       | <i>p</i> <sup>2</sup> |
|                   |          |        |           | Lower         | Upper |                       |          |        |           | Lower         | Upper |                       |
| 246               | 2193     | 124    | 2.54      | 1.24          | 5.22  | .011                  | 2200     | 123    | 1.33      | 0.59          | 3.03  | .491                  |
| 247               | 2200     | 124    | 1.45      | 0.73          | 2.87  | .284                  | 2209     | 123    | 1.73      | 0.97          | 3.09  | .063                  |
| 248               | 2193     | 124    | 1.24      | 0.87          | 1.77  | .239                  | 2206     | 123    | 1.28      | 0.89          | 1.82  | .182                  |
| 249               | 2174     | 121    | 1.01      | 0.70          | 1.48  | .941                  | 2190     | 122    | 1.01      | 0.69          | 1.46  | .974                  |
| 250               | 2194     | 124    | 1.18      | 0.82          | 1.70  | .376                  | 2207     | 123    | 1.69      | 1.14          | 2.48  | .008                  |
| 251*              | 2200     | 124    | 1.99      | 1.29          | 3.07  | .002                  | 2209     | 124    | 2.47      | 1.65          | 3.71  | .000                  |
| 252               | 2200     | 124    | 1.63      | 1.06          | 2.51  | .028                  | 2209     | 124    | 1.52      | 1.00          | 2.31  | .051                  |
| 253               | 2197     | 123    | 0.94      | 0.64          | 1.37  | .738                  | 2206     | 124    | 0.93      | 0.64          | 1.36  | .706                  |
| 254               | 2198     | 124    | 1.42      | 0.97          | 2.08  | .073                  | 2210     | 124    | 1.15      | 0.78          | 1.71  | .476                  |
| 255               | 2187     | 123    | 0.81      | 0.56          | 1.16  | .246                  | 2200     | 124    | 0.67      | 0.47          | 0.97  | .034                  |
| 256               | 2198     | 124    | 2.15      | 1.23          | 3.76  | .007                  | 2209     | 124    | 1.52      | 0.84          | 2.76  | .170                  |
| 257               | 2198     | 124    | 0.63      | 0.34          | 1.17  | .141                  | 2209     | 124    | 0.75      | 0.38          | 1.48  | .411                  |
| 258               | 2180     | 123    | 0.90      | 0.47          | 1.73  | .753                  | 2196     | 123    | 0.85      | 0.45          | 1.58  | .600                  |

| Item <sup>1</sup> | Sample 1 |        |           |               |       |                       | Sample 2 |        |           |               |       |                       |
|-------------------|----------|--------|-----------|---------------|-------|-----------------------|----------|--------|-----------|---------------|-------|-----------------------|
|                   | <i>N</i> | Deaths | <i>HR</i> | 95% <i>CI</i> |       | <i>p</i> <sup>2</sup> | <i>N</i> | Deaths | <i>HR</i> | 95% <i>CI</i> |       | <i>p</i> <sup>2</sup> |
|                   |          |        |           | Lower         | Upper |                       |          |        |           | Lower         | Upper |                       |
| 259*              | 2200     | 124    | 1.78      | 1.25          | 2.54  | .001                  | 2210     | 124    | 1.60      | 1.12          | 2.28  | .010                  |
| 260               | 2198     | 124    | 1.07      | 0.75          | 1.53  | .720                  | 2208     | 124    | 1.15      | 0.81          | 1.65  | .438                  |
| 261               | 2195     | 124    | 1.10      | 0.74          | 1.62  | .633                  | 2206     | 124    | 0.70      | 0.45          | 1.09  | .111                  |
| 262               | 2199     | 124    | 0.98      | 0.64          | 1.51  | .942                  | 2210     | 124    | 0.64      | 0.44          | 0.95  | .026                  |
| 263               | 2200     | 124    | 1.99      | 1.40          | 2.84  | .000                  | 2210     | 124    | 1.33      | 0.93          | 1.91  | .116                  |
| 264               | 2200     | 124    | 0.97      | 0.67          | 1.39  | .862                  | 2206     | 124    | 0.78      | 0.54          | 1.12  | .179                  |
| 265*              | 2195     | 124    | 1.64      | 1.14          | 2.37  | .008                  | 2209     | 124    | 1.74      | 1.21          | 2.49  | .003                  |
| 266               | 2198     | 124    | 1.58      | 1.10          | 2.26  | .013                  | 2207     | 124    | 1.75      | 1.22          | 2.50  | .002                  |
| 267               | 2200     | 124    | 1.05      | 0.73          | 1.50  | .803                  | 2209     | 124    | 1.54      | 1.08          | 2.20  | .016                  |
| 268               | 2194     | 124    | 1.24      | 0.83          | 1.86  | .294                  | 2205     | 124    | 1.18      | 0.79          | 1.77  | .411                  |
| 269               | 2201     | 124    | 0.96      | 0.51          | 1.78  | .888                  | 2208     | 124    | 2.21      | 1.37          | 3.58  | .001                  |
| 270               | 2198     | 124    | 0.49      | 0.31          | 0.78  | .002                  | 2209     | 124    | 0.93      | 0.63          | 1.37  | .711                  |
| 271               | 2196     | 124    | 1.47      | 0.96          | 2.25  | .079                  | 2208     | 124    | 1.68      | 1.12          | 2.51  | .012                  |

| Sample 1          |          |        |           |               |       |                       | Sample 2 |        |           |               |       |                       |
|-------------------|----------|--------|-----------|---------------|-------|-----------------------|----------|--------|-----------|---------------|-------|-----------------------|
| Item <sup>1</sup> | <i>N</i> | Deaths | <i>HR</i> | 95% <i>CI</i> |       | <i>p</i> <sup>2</sup> | <i>N</i> | Deaths | <i>HR</i> | 95% <i>CI</i> |       | <i>p</i> <sup>2</sup> |
|                   |          |        |           | Lower         | Upper |                       |          |        |           | Lower         | Upper |                       |
| 272               | 2199     | 124    | 0.54      | 0.34          | 0.84  | .007                  | 2209     | 124    | 0.63      | 0.38          | 1.04  | .068                  |
| 273*              | 2199     | 124    | 2.71      | 1.86          | 3.94  | .000                  | 2208     | 123    | 1.99      | 1.32          | 2.99  | .001                  |
| 274               | 2200     | 124    | 0.64      | 0.45          | 0.92  | .016                  | 2210     | 124    | 0.97      | 0.68          | 1.40  | .882                  |
| 275               | 2200     | 124    | 1.78      | 0.73          | 4.37  | .207                  | 2209     | 124    | 1.62      | 0.60          | 4.43  | .343                  |
| 276               | 2197     | 123    | 0.81      | 0.44          | 1.47  | .485                  | 2209     | 124    | 0.67      | 0.37          | 1.19  | .173                  |
| 277               | 2196     | 124    | 1.49      | 1.04          | 2.12  | .028                  | 2209     | 124    | 1.44      | 1.01          | 2.05  | .041                  |
| 278               | 2198     | 124    | 1.55      | 1.08          | 2.23  | .019                  | 2210     | 124    | 1.71      | 1.19          | 2.44  | .003                  |
| 279*              | 2200     | 123    | 2.27      | 1.49          | 3.45  | .000                  | 2209     | 124    | 1.84      | 1.18          | 2.86  | .007                  |
| 280               | 2194     | 123    | 1.94      | 1.34          | 2.79  | .000                  | 2203     | 124    | 1.23      | 0.84          | 1.79  | .287                  |
| 281               | 2201     | 124    | 0.73      | 0.50          | 1.06  | .101                  | 2208     | 124    | 0.73      | 0.50          | 1.06  | .101                  |
| 282               | 2199     | 124    | 1.43      | 0.98          | 2.09  | .064                  | 2209     | 124    | 1.47      | 1.01          | 2.14  | .046                  |
| 283               | 2196     | 123    | 0.73      | 0.51          | 1.04  | .079                  | 2207     | 124    | 0.72      | 0.50          | 1.03  | .069                  |
| 284               | 2197     | 124    | 1.78      | 1.24          | 2.56  | .002                  | 2209     | 124    | 1.59      | 1.10          | 2.30  | .013                  |

| Item <sup>1</sup> | Sample 1 |        |           |               |       |                       | Sample 2 |        |             |               |       |                       |
|-------------------|----------|--------|-----------|---------------|-------|-----------------------|----------|--------|-------------|---------------|-------|-----------------------|
|                   | <i>N</i> | Deaths | <i>HR</i> | 95% <i>CI</i> |       | <i>p</i> <sup>2</sup> | <i>N</i> | Deaths | <i>HR</i>   | 95% <i>CI</i> |       | <i>p</i> <sup>2</sup> |
|                   |          |        |           | Lower         | Upper |                       |          |        |             | Lower         | Upper |                       |
| 285               | 2200     | 123    | 1.10      | 0.45          | 2.72  | .829                  | 2209     | 124    | 10620000.00 | 0.00          | ∞     | .991                  |
| 286               | 2197     | 124    | 1.82      | 1.15          | 2.87  | .011                  | 2207     | 124    | 1.30        | 0.78          | 2.15  | .314                  |
| 287               | 2175     | 122    | 0.87      | 0.61          | 1.25  | .448                  | 2182     | 121    | 1.09        | 0.76          | 1.57  | .649                  |
| 289               | 2197     | 123    | 0.99      | 0.65          | 1.51  | .977                  | 2206     | 124    | 1.17        | 0.76          | 1.82  | .479                  |
| 291               | 2201     | 124    | 0.97      | 0.24          | 3.91  | .961                  | 2210     | 124    | 3.57        | 1.66          | 7.67  | .001                  |
| 292               | 2199     | 123    | 1.29      | 0.90          | 1.85  | .166                  | 2209     | 124    | 1.55        | 1.09          | 2.21  | .015                  |
| 293               | 2201     | 124    | 2.11      | 1.15          | 3.86  | .016                  | 2210     | 124    | 2.16        | 1.23          | 3.78  | .007                  |
| 294*              | 2201     | 124    | 0.59      | 0.40          | 0.85  | .005                  | 2210     | 124    | 0.54        | 0.36          | 0.78  | .001                  |
| 295               | 2160     | 121    | 0.93      | 0.65          | 1.33  | .692                  | 2181     | 122    | 0.98        | 0.68          | 1.40  | .891                  |
| 296               | 2198     | 124    | 0.96      | 0.67          | 1.38  | .827                  | 2206     | 124    | 0.96        | 0.66          | 1.38  | .813                  |
| 297               | 2184     | 122    | 1.03      | 0.65          | 1.64  | .894                  | 2195     | 124    | 1.22        | 0.80          | 1.86  | .347                  |
| 298*              | 2187     | 124    | 1.66      | 1.15          | 2.39  | .007                  | 2201     | 122    | 1.95        | 1.36          | 2.79  | .000                  |
| 299               | 2192     | 124    | 1.13      | 0.79          | 1.62  | .489                  | 2198     | 123    | 1.46        | 1.03          | 2.08  | .035                  |



| Item <sup>1</sup> | Sample 1 |        |           |               |       |                       | Sample 2 |        |           |               |       |                       |
|-------------------|----------|--------|-----------|---------------|-------|-----------------------|----------|--------|-----------|---------------|-------|-----------------------|
|                   | <i>N</i> | Deaths | <i>HR</i> | 95% <i>CI</i> |       | <i>p</i> <sup>2</sup> | <i>N</i> | Deaths | <i>HR</i> | 95% <i>CI</i> |       | <i>p</i> <sup>2</sup> |
|                   |          |        |           | Lower         | Upper |                       |          |        |           | Lower         | Upper |                       |
| 300               | 2173     | 123    | 1.54      | 1.00          | 2.38  | .050                  | 2185     | 122    | 1.00      | 0.67          | 1.49  | .991                  |
| 301*              | 2200     | 124    | 1.85      | 1.27          | 2.72  | .002                  | 2208     | 124    | 2.21      | 1.52          | 3.20  | .000                  |
| 303*              | 2199     | 124    | 1.69      | 1.17          | 2.44  | .005                  | 2207     | 124    | 1.63      | 1.12          | 2.35  | .010                  |
| 304               | 2199     | 124    | 1.12      | 0.77          | 1.64  | .549                  | 2210     | 124    | 1.14      | 0.78          | 1.66  | .503                  |
| 305*              | 2196     | 124    | 1.89      | 1.30          | 2.75  | .001                  | 2210     | 124    | 2.57      | 1.80          | 3.68  | .000                  |
| 306               | 2187     | 123    | 0.66      | 0.42          | 1.03  | .068                  | 2199     | 123    | 0.50      | 0.33          | 0.76  | .001                  |
| 307*              | 2195     | 123    | 1.69      | 1.19          | 2.42  | .004                  | 2208     | 124    | 1.78      | 1.25          | 2.55  | .001                  |
| 309               | 2197     | 124    | 1.13      | 0.73          | 1.75  | .591                  | 2210     | 124    | 0.62      | 0.42          | 0.92  | .016                  |
| 312               | 2191     | 124    | 1.34      | 0.81          | 2.22  | .248                  | 2209     | 124    | 1.60      | 1.00          | 2.57  | .050                  |
| 313*              | 2185     | 123    | 1.74      | 1.20          | 2.52  | .003                  | 2202     | 124    | 1.93      | 1.33          | 2.79  | .001                  |
| 316               | 2198     | 124    | 1.58      | 1.07          | 2.33  | .020                  | 2207     | 124    | 1.59      | 1.07          | 2.35  | .022                  |
| 317*              | 2196     | 124    | 1.96      | 1.37          | 2.79  | .000                  | 2202     | 124    | 1.61      | 1.13          | 2.29  | .008                  |
| 319               | 2192     | 122    | 1.57      | 1.08          | 2.28  | .018                  | 2205     | 124    | 1.37      | 0.95          | 1.95  | .088                  |

| Sample 1          |          |        |           |               |       |                       | Sample 2 |        |           |               |       |                       |
|-------------------|----------|--------|-----------|---------------|-------|-----------------------|----------|--------|-----------|---------------|-------|-----------------------|
| Item <sup>1</sup> | <i>N</i> | Deaths | <i>HR</i> | 95% <i>CI</i> |       | <i>p</i> <sup>2</sup> | <i>N</i> | Deaths | <i>HR</i> | 95% <i>CI</i> |       | <i>p</i> <sup>2</sup> |
|                   |          |        |           | Lower         | Upper |                       |          |        |           | Lower         | Upper |                       |
| 320               | 2200     | 124    | 1.29      | 0.86          | 1.92  | .217                  | 2205     | 124    | 0.74      | 0.47          | 1.18  | .208                  |
| 321               | 2201     | 124    | 1.38      | 0.97          | 1.97  | .072                  | 2210     | 124    | 1.34      | 0.94          | 1.91  | .105                  |
| 322               | 2201     | 124    | 1.82      | 1.20          | 2.77  | .005                  | 2210     | 124    | 1.39      | 0.93          | 2.06  | .106                  |
| 324               | 2199     | 123    | 1.74      | 0.55          | 5.49  | .343                  | 2210     | 124    | 2.00      | 0.74          | 5.44  | .172                  |
| 325               | 2201     | 124    | 1.09      | 0.72          | 1.65  | .688                  | 2209     | 124    | 1.26      | 0.85          | 1.87  | .255                  |
| 327               | 2200     | 124    | 1.16      | 0.79          | 1.70  | .438                  | 2208     | 124    | 1.18      | 0.80          | 1.72  | .407                  |
| 329               | 2200     | 124    | 1.02      | 0.70          | 1.49  | .912                  | 2207     | 123    | 0.54      | 0.35          | 0.84  | .006                  |
| 330               | 2198     | 124    | 0.46      | 0.32          | 0.68  | .000                  | 2209     | 124    | 0.59      | 0.39          | 0.88  | .011                  |
| 332               | 2200     | 124    | 1.63      | 1.06          | 2.51  | .025                  | 2209     | 123    | 1.62      | 1.06          | 2.47  | .027                  |
| 334               | 2201     | 124    | 1.73      | 1.13          | 2.65  | .012                  | 2208     | 124    | 2.19      | 1.48          | 3.25  | .000                  |
| 335*              | 2200     | 124    | 2.22      | 1.51          | 3.26  | .000                  | 2210     | 124    | 1.97      | 1.33          | 2.94  | .001                  |
| 336               | 2199     | 124    | 1.43      | 1.00          | 2.03  | .049                  | 2210     | 124    | 1.99      | 1.39          | 2.84  | .000                  |
| 337               | 2198     | 124    | 1.70      | 1.11          | 2.60  | .016                  | 2207     | 124    | 2.19      | 1.48          | 3.23  | .000                  |

| Item <sup>1</sup> | Sample 1 |        |           |               |       |                       | Sample 2 |        |           |               |       |                       |
|-------------------|----------|--------|-----------|---------------|-------|-----------------------|----------|--------|-----------|---------------|-------|-----------------------|
|                   | <i>N</i> | Deaths | <i>HR</i> | 95% <i>CI</i> |       | <i>p</i> <sup>2</sup> | <i>N</i> | Deaths | <i>HR</i> | 95% <i>CI</i> |       | <i>p</i> <sup>2</sup> |
|                   |          |        |           | Lower         | Upper |                       |          |        |           | Lower         | Upper |                       |
| 338*              | 2196     | 123    | 2.35      | 1.61          | 3.44  | .000                  | 2208     | 124    | 2.16      | 1.48          | 3.15  | .000                  |
| 339               | 2199     | 124    | 2.18      | 1.10          | 4.34  | .026                  | 2207     | 124    | 3.14      | 1.79          | 5.51  | .000                  |
| 340               | 2201     | 124    | 1.41      | 0.99          | 2.02  | .060                  | 2210     | 124    | 1.05      | 0.74          | 1.50  | .770                  |
| 341               | 2200     | 124    | 1.60      | 0.94          | 2.71  | .084                  | 2209     | 124    | 1.69      | 1.06          | 2.70  | .027                  |
| 342               | 2199     | 124    | 1.50      | 1.00          | 2.25  | .047                  | 2209     | 124    | 1.70      | 1.16          | 2.49  | .006                  |
| 343               | 2198     | 124    | 1.79      | 1.25          | 2.56  | .002                  | 2208     | 124    | 1.26      | 0.87          | 1.80  | .217                  |
| 344*              | 2199     | 124    | 2.22      | 1.43          | 3.44  | .000                  | 2210     | 124    | 1.93      | 1.23          | 3.01  | .004                  |
| 345*              | 2200     | 124    | 2.01      | 1.29          | 3.13  | .002                  | 2209     | 124    | 2.09      | 1.35          | 3.25  | .001                  |
| 346               | 2201     | 124    | 2.01      | 1.35          | 2.99  | .001                  | 2209     | 124    | 1.38      | 0.90          | 2.11  | .142                  |
| 347               | 2189     | 122    | 1.73      | 0.97          | 3.09  | .065                  | 2206     | 124    | 0.56      | 0.37          | 0.84  | .005                  |
| 348               | 2198     | 122    | 2.47      | 1.65          | 3.70  | .000                  | 2208     | 123    | 1.32      | 0.92          | 1.91  | .136                  |
| 349               | 2195     | 123    | 1.46      | 0.95          | 2.23  | .082                  | 2205     | 123    | 1.91      | 1.29          | 2.83  | .001                  |
| 350*              | 2201     | 124    | 2.34      | 1.38          | 3.96  | .002                  | 2209     | 124    | 2.07      | 1.22          | 3.52  | .007                  |

| Sample 1          |          |        |           |               |       |                       | Sample 2 |        |           |               |       |                       |
|-------------------|----------|--------|-----------|---------------|-------|-----------------------|----------|--------|-----------|---------------|-------|-----------------------|
| Item <sup>1</sup> | <i>N</i> | Deaths | <i>HR</i> | 95% <i>CI</i> |       | <i>p</i> <sup>2</sup> | <i>N</i> | Deaths | <i>HR</i> | 95% <i>CI</i> |       | <i>p</i> <sup>2</sup> |
|                   |          |        |           | Lower         | Upper |                       |          |        |           | Lower         | Upper |                       |
| 351               | 2201     | 124    | 1.30      | 0.74          | 2.27  | .362                  | 2210     | 124    | 2.25      | 1.45          | 3.49  | .000                  |
| 352               | 2200     | 124    | 1.75      | 1.14          | 2.70  | .011                  | 2208     | 124    | 2.16      | 1.45          | 3.21  | .000                  |
| 353               | 2201     | 124    | 1.06      | 0.73          | 1.54  | .761                  | 2209     | 124    | 0.73      | 0.51          | 1.04  | .077                  |
| 354               | 2201     | 124    | 2.12      | 0.93          | 4.84  | .076                  | 2208     | 124    | 1.79      | 0.83          | 3.86  | .138                  |
| 355               | 2200     | 124    | 1.34      | 0.68          | 2.67  | .396                  | 2209     | 124    | 1.15      | 0.56          | 2.37  | .701                  |
| 356               | 2198     | 124    | 1.37      | 0.95          | 2.00  | .095                  | 2208     | 124    | 1.56      | 1.08          | 2.25  | .017                  |
| 357               | 2200     | 124    | 1.59      | 1.10          | 2.28  | .014                  | 2208     | 124    | 1.08      | 0.73          | 1.59  | .710                  |
| 358*              | 2201     | 124    | 2.18      | 1.43          | 3.33  | .000                  | 2208     | 123    | 2.29      | 1.50          | 3.51  | .000                  |
| 359*              | 2201     | 124    | 2.06      | 1.43          | 2.95  | .000                  | 2207     | 124    | 1.62      | 1.12          | 2.35  | .010                  |
| 360               | 2198     | 123    | 2.59      | 1.35          | 4.96  | .004                  | 2206     | 123    | 1.70      | 0.82          | 3.51  | .152                  |
| 361               | 2201     | 124    | 1.35      | 0.94          | 1.94  | .100                  | 2209     | 124    | 1.65      | 1.16          | 2.34  | .006                  |
| 363               | 2200     | 124    | 1.83      | 0.80          | 4.19  | .150                  | 2209     | 124    | 1.55      | 0.68          | 3.53  | .295                  |
| 364               | 2196     | 123    | 1.73      | 1.10          | 2.74  | .018                  | 2206     | 124    | 1.94      | 1.25          | 3.02  | .003                  |

| Item <sup>1</sup> | Sample 1 |        |           |               |       |                       | Sample 2 |        |           |               |       |                       |
|-------------------|----------|--------|-----------|---------------|-------|-----------------------|----------|--------|-----------|---------------|-------|-----------------------|
|                   | <i>N</i> | Deaths | <i>HR</i> | 95% <i>CI</i> |       | <i>p</i> <sup>2</sup> | <i>N</i> | Deaths | <i>HR</i> | 95% <i>CI</i> |       | <i>p</i> <sup>2</sup> |
|                   |          |        |           | Lower         | Upper |                       |          |        |           | Lower         | Upper |                       |
| 365               | 2201     | 124    | 1.67      | 1.02          | 2.73  | .042                  | 2208     | 123    | 1.37      | 0.82          | 2.30  | .229                  |
| 367               | 2201     | 124    | 0.90      | 0.63          | 1.29  | .574                  | 2208     | 124    | 0.70      | 0.49          | 1.00  | .050                  |
| 368               | 2198     | 124    | 1.92      | 1.34          | 2.75  | .000                  | 2209     | 124    | 1.29      | 0.91          | 1.84  | .155                  |
| 369               | 2188     | 124    | 0.82      | 0.55          | 1.20  | .304                  | 2199     | 122    | 0.90      | 0.60          | 1.35  | .596                  |
| 370               | 2199     | 124    | 1.25      | 0.80          | 1.94  | .330                  | 2207     | 123    | 1.14      | 0.73          | 1.77  | .565                  |
| 371               | 2195     | 122    | 0.93      | 0.64          | 1.33  | .680                  | 2207     | 124    | 0.98      | 0.68          | 1.41  | .930                  |
| 372               | 2194     | 124    | 0.86      | 0.59          | 1.24  | .409                  | 2205     | 124    | 0.89      | 0.62          | 1.28  | .534                  |
| 373               | 2180     | 121    | 1.06      | 0.73          | 1.54  | .752                  | 2193     | 123    | 1.11      | 0.77          | 1.60  | .562                  |
| 374               | 2200     | 124    | 1.61      | 1.08          | 2.40  | .019                  | 2210     | 124    | 1.11      | 0.76          | 1.62  | .578                  |
| 375*              | 2201     | 124    | 2.12      | 1.45          | 3.10  | .000                  | 2206     | 124    | 2.09      | 1.44          | 3.04  | .000                  |
| 376               | 2193     | 124    | 0.73      | 0.48          | 1.11  | .144                  | 2200     | 124    | 0.54      | 0.37          | 0.78  | .001                  |
| 377               | 2198     | 123    | 1.23      | 0.86          | 1.75  | .253                  | 2206     | 124    | 1.50      | 1.05          | 2.14  | .024                  |
| 378               | 2193     | 123    | 0.92      | 0.64          | 1.31  | .638                  | 2198     | 122    | 0.63      | 0.44          | 0.91  | .015                  |

| Item <sup>1</sup> | Sample 1 |        |           |               |       |                       | Sample 2 |        |           |               |       |                       |
|-------------------|----------|--------|-----------|---------------|-------|-----------------------|----------|--------|-----------|---------------|-------|-----------------------|
|                   | <i>N</i> | Deaths | <i>HR</i> | 95% <i>CI</i> |       | <i>p</i> <sup>2</sup> | <i>N</i> | Deaths | <i>HR</i> | 95% <i>CI</i> |       | <i>p</i> <sup>2</sup> |
|                   |          |        |           | Lower         | Upper |                       |          |        |           | Lower         | Upper |                       |
| 379*              | 2195     | 124    | 0.57      | 0.40          | 0.81  | .002                  | 2210     | 124    | 0.54      | 0.37          | 0.77  | .001                  |
| 380               | 2194     | 123    | 0.91      | 0.64          | 1.31  | .619                  | 2205     | 124    | 1.33      | 0.90          | 1.95  | .147                  |
| 381*              | 2198     | 124    | 1.72      | 1.19          | 2.48  | .004                  | 2209     | 124    | 2.08      | 1.45          | 2.98  | .000                  |
| 382               | 2195     | 124    | 1.42      | 0.99          | 2.02  | .054                  | 2203     | 123    | 1.44      | 1.01          | 2.06  | .044                  |
| 383*              | 2199     | 123    | 1.72      | 1.20          | 2.45  | .003                  | 2207     | 124    | 2.08      | 1.46          | 2.96  | .000                  |
| 384               | 2200     | 124    | 1.32      | 0.93          | 1.88  | .125                  | 2209     | 124    | 1.76      | 1.23          | 2.51  | .002                  |
| 385               | 2200     | 124    | 1.37      | 0.93          | 2.00  | .107                  | 2208     | 124    | 1.18      | 0.80          | 1.74  | .400                  |
| 386*              | 2200     | 124    | 1.67      | 1.16          | 2.40  | .005                  | 2207     | 124    | 1.64      | 1.14          | 2.36  | .007                  |
| 387               | 2170     | 124    | 1.74      | 1.19          | 2.54  | .004                  | 2184     | 122    | 1.27      | 0.85          | 1.90  | .246                  |
| 388               | 2201     | 124    | 2.35      | 1.40          | 3.94  | .001                  | 2207     | 124    | 1.82      | 1.02          | 3.24  | .043                  |
| 389*              | 2198     | 124    | 2.35      | 1.64          | 3.38  | .000                  | 2208     | 124    | 1.89      | 1.31          | 2.72  | .001                  |
| 390               | 2196     | 123    | 1.74      | 1.20          | 2.51  | .003                  | 2194     | 124    | 1.27      | 0.89          | 1.82  | .189                  |
| 391               | 2201     | 124    | 1.10      | 0.77          | 1.58  | .603                  | 2209     | 124    | 1.12      | 0.78          | 1.60  | .547                  |

| Sample 1          |          |        |           |               |       |                       | Sample 2 |        |           |               |       |                       |
|-------------------|----------|--------|-----------|---------------|-------|-----------------------|----------|--------|-----------|---------------|-------|-----------------------|
| Item <sup>1</sup> | <i>N</i> | Deaths | <i>HR</i> | 95% <i>CI</i> |       | <i>p</i> <sup>2</sup> | <i>N</i> | Deaths | <i>HR</i> | 95% <i>CI</i> |       | <i>p</i> <sup>2</sup> |
|                   |          |        |           | Lower         | Upper |                       |          |        |           | Lower         | Upper |                       |
| 392               | 2200     | 124    | 1.06      | 0.62          | 1.83  | .825                  | 2209     | 124    | 1.29      | 0.78          | 2.12  | .318                  |
| 393               | 2197     | 124    | 1.11      | 0.41          | 3.01  | .837                  | 2205     | 124    | 0.75      | 0.24          | 2.36  | .623                  |
| 394               | 2198     | 123    | 1.19      | 0.84          | 1.70  | .332                  | 2209     | 124    | 1.15      | 0.81          | 1.63  | .448                  |
| 395*              | 2198     | 124    | 2.25      | 1.54          | 3.29  | .000                  | 2207     | 123    | 1.85      | 1.26          | 2.72  | .002                  |
| 396*              | 2200     | 124    | 1.72      | 1.17          | 2.53  | .006                  | 2209     | 124    | 1.74      | 1.18          | 2.55  | .005                  |
| 397*              | 2200     | 124    | 1.62      | 1.13          | 2.30  | .008                  | 2205     | 123    | 1.90      | 1.33          | 2.71  | .000                  |
| 398*              | 2201     | 124    | 1.74      | 1.20          | 2.54  | .004                  | 2209     | 124    | 1.75      | 1.21          | 2.54  | .003                  |
| 399               | 2199     | 124    | 0.61      | 0.43          | 0.87  | .006                  | 2209     | 124    | 0.71      | 0.49          | 1.02  | .060                  |
| 400               | 2178     | 122    | 1.41      | 0.96          | 2.08  | .079                  | 2188     | 123    | 1.11      | 0.76          | 1.61  | .598                  |
| 401               | 2201     | 124    | 0.94      | 0.65          | 1.34  | .717                  | 2209     | 124    | 1.36      | 0.93          | 2.00  | .114                  |
| 402               | 2199     | 124    | 1.31      | 0.91          | 1.88  | .142                  | 2208     | 124    | 1.48      | 1.04          | 2.11  | .029                  |
| 403               | 2194     | 124    | 0.65      | 0.40          | 1.05  | .075                  | 2200     | 123    | 0.62      | 0.38          | 1.00  | .048                  |
| 404               | 2197     | 124    | 2.08      | 1.43          | 3.03  | .000                  | 2205     | 124    | 1.29      | 0.90          | 1.86  | .161                  |

| Item <sup>1</sup> | Sample 1 |        |           |               |       |                       | Sample 2 |        |           |               |       |                       |
|-------------------|----------|--------|-----------|---------------|-------|-----------------------|----------|--------|-----------|---------------|-------|-----------------------|
|                   | <i>N</i> | Deaths | <i>HR</i> | 95% <i>CI</i> |       | <i>p</i> <sup>2</sup> | <i>N</i> | Deaths | <i>HR</i> | 95% <i>CI</i> |       | <i>p</i> <sup>2</sup> |
|                   |          |        |           | Lower         | Upper |                       |          |        |           | Lower         | Upper |                       |
| 405               | 2200     | 124    | 0.75      | 0.38          | 1.48  | .409                  | 2207     | 124    | 0.71      | 0.37          | 1.36  | .300                  |
| 406               | 2199     | 124    | 1.34      | 0.89          | 2.01  | .165                  | 2205     | 124    | 1.36      | 0.90          | 2.07  | .148                  |
| 407               | 2199     | 124    | 0.76      | 0.50          | 1.16  | .207                  | 2208     | 124    | 0.71      | 0.47          | 1.06  | .097                  |
| 408               | 2197     | 124    | 1.93      | 1.26          | 2.96  | .003                  | 2207     | 124    | 1.45      | 0.97          | 2.16  | .067                  |
| 409               | 2200     | 124    | 1.25      | 0.86          | 1.81  | .240                  | 2205     | 124    | 1.16      | 0.80          | 1.69  | .425                  |
| 410               | 2192     | 123    | 1.28      | 0.88          | 1.85  | .196                  | 2201     | 123    | 1.19      | 0.82          | 1.72  | .362                  |
| 411               | 2199     | 124    | 0.96      | 0.62          | 1.50  | .867                  | 2208     | 124    | 1.84      | 1.25          | 2.70  | .002                  |
| 412               | 2201     | 124    | 0.78      | 0.54          | 1.13  | .186                  | 2208     | 124    | 0.68      | 0.47          | 0.97  | .035                  |
| 413               | 2184     | 123    | 1.50      | 0.96          | 2.33  | .073                  | 2200     | 123    | 1.37      | 0.87          | 2.17  | .172                  |
| 414               | 2195     | 124    | 1.84      | 1.28          | 2.63  | .001                  | 2206     | 124    | 1.23      | 0.84          | 1.80  | .280                  |
| 415               | 2184     | 122    | 0.81      | 0.56          | 1.18  | .275                  | 2195     | 123    | 0.91      | 0.63          | 1.32  | .618                  |
| 416               | 2199     | 124    | 1.54      | 1.08          | 2.21  | .018                  | 2206     | 124    | 1.59      | 1.11          | 2.26  | .011                  |
| 417               | 2201     | 124    | 1.40      | 0.98          | 1.99  | .067                  | 2208     | 123    | 1.77      | 1.24          | 2.52  | .002                  |



| Sample 1          |          |        |           |               |       |                       | Sample 2 |        |           |               |       |                       |
|-------------------|----------|--------|-----------|---------------|-------|-----------------------|----------|--------|-----------|---------------|-------|-----------------------|
| Item <sup>1</sup> | <i>N</i> | Deaths | <i>HR</i> | 95% <i>CI</i> |       | <i>p</i> <sup>2</sup> | <i>N</i> | Deaths | <i>HR</i> | 95% <i>CI</i> |       | <i>p</i> <sup>2</sup> |
|                   |          |        |           | Lower         | Upper |                       |          |        |           | Lower         | Upper |                       |
| 418*              | 2200     | 124    | 1.73      | 1.19          | 2.50  | .004                  | 2206     | 124    | 1.90      | 1.31          | 2.74  | .001                  |
| 419*              | 2201     | 124    | 1.97      | 1.35          | 2.86  | .000                  | 2207     | 124    | 1.88      | 1.29          | 2.74  | .001                  |
| 420               | 2183     | 122    | 1.30      | 0.76          | 2.20  | .339                  | 2184     | 121    | 1.32      | 0.80          | 2.20  | .280                  |
| 421               | 2199     | 123    | 2.04      | 1.43          | 2.91  | .000                  | 2206     | 124    | 1.49      | 1.04          | 2.15  | .030                  |
| 422               | 2201     | 124    | 0.79      | 0.37          | 1.69  | .537                  | 2208     | 124    | 1.59      | 0.91          | 2.78  | .103                  |
| 423               | 2201     | 124    | 1.21      | 0.80          | 1.82  | .372                  | 2209     | 124    | 1.19      | 0.79          | 1.80  | .401                  |
| 424               | 2201     | 124    | 0.80      | 0.41          | 1.58  | .526                  | 2208     | 124    | 0.96      | 0.51          | 1.78  | .889                  |
| 425               | 2200     | 123    | 1.49      | 1.05          | 2.13  | .027                  | 2207     | 124    | 1.79      | 1.25          | 2.56  | .001                  |
| 426               | 2199     | 124    | 1.70      | 1.15          | 2.51  | .008                  | 2208     | 124    | 1.03      | 0.72          | 1.48  | .856                  |
| 427               | 2198     | 124    | 0.54      | 0.26          | 1.11  | .094                  | 2208     | 124    | 0.78      | 0.44          | 1.40  | .409                  |
| 428               | 2199     | 124    | 1.11      | 0.78          | 1.59  | .549                  | 2206     | 124    | 0.81      | 0.57          | 1.16  | .243                  |
| 429               | 2197     | 124    | 0.99      | 0.69          | 1.43  | .972                  | 2207     | 124    | 0.77      | 0.53          | 1.12  | .167                  |
| 430               | 2197     | 123    | 0.77      | 0.45          | 1.31  | .332                  | 2207     | 124    | 0.44      | 0.28          | 0.68  | .000                  |

| Item <sup>1</sup> | Sample 1 |        |           |               |       |                       | Sample 2 |        |           |               |       |                       |
|-------------------|----------|--------|-----------|---------------|-------|-----------------------|----------|--------|-----------|---------------|-------|-----------------------|
|                   | <i>N</i> | Deaths | <i>HR</i> | 95% <i>CI</i> |       | <i>p</i> <sup>2</sup> | <i>N</i> | Deaths | <i>HR</i> | 95% <i>CI</i> |       | <i>p</i> <sup>2</sup> |
|                   |          |        |           | Lower         | Upper |                       |          |        |           | Lower         | Upper |                       |
| 431*              | 2199     | 124    | 1.80      | 1.26          | 2.56  | .001                  | 2208     | 124    | 1.63      | 1.14          | 2.33  | .008                  |
| 432               | 2201     | 124    | 0.83      | 0.58          | 1.21  | .333                  | 2206     | 124    | 0.93      | 0.65          | 1.33  | .683                  |
| 433               | 2195     | 124    | 0.90      | 0.46          | 1.78  | .771                  | 2206     | 123    | 1.32      | 0.74          | 2.36  | .340                  |
| 434               | 2201     | 124    | 1.36      | 0.94          | 1.96  | .103                  | 2207     | 124    | 1.07      | 0.75          | 1.54  | .710                  |
| 435               | 2188     | 121    | 1.51      | 1.03          | 2.20  | .033                  | 2191     | 123    | 1.21      | 0.82          | 1.79  | .325                  |
| 436               | 2195     | 124    | 1.71      | 1.05          | 2.81  | .032                  | 2200     | 122    | 1.30      | 0.82          | 2.07  | .265                  |
| 437               | 2187     | 123    | 1.56      | 1.08          | 2.26  | .018                  | 2203     | 124    | 1.48      | 1.02          | 2.14  | .039                  |
| 438               | 2196     | 123    | 1.54      | 1.07          | 2.20  | .019                  | 2204     | 124    | 1.42      | 0.99          | 2.03  | .056                  |
| 439*              | 2201     | 124    | 2.26      | 1.55          | 3.29  | .000                  | 2207     | 123    | 1.79      | 1.24          | 2.59  | .002                  |
| 440               | 2192     | 124    | 1.03      | 0.66          | 1.63  | .884                  | 2202     | 124    | 1.20      | 0.75          | 1.92  | .450                  |
| 441               | 2193     | 124    | 1.14      | 0.75          | 1.73  | .536                  | 2198     | 124    | 1.24      | 0.80          | 1.93  | .340                  |
| 442*              | 2201     | 124    | 2.00      | 1.33          | 3.02  | .001                  | 2208     | 124    | 2.03      | 1.33          | 3.10  | .001                  |
| 443               | 2199     | 124    | 1.37      | 0.93          | 2.01  | .111                  | 2205     | 122    | 1.20      | 0.81          | 1.78  | .367                  |

| Item <sup>1</sup> | Sample 1 |        |           |               |       |                       | Sample 2 |        |           |               |       |                       |
|-------------------|----------|--------|-----------|---------------|-------|-----------------------|----------|--------|-----------|---------------|-------|-----------------------|
|                   | <i>N</i> | Deaths | <i>HR</i> | 95% <i>CI</i> |       | <i>p</i> <sup>2</sup> | <i>N</i> | Deaths | <i>HR</i> | 95% <i>CI</i> |       | <i>p</i> <sup>2</sup> |
|                   |          |        |           | Lower         | Upper |                       |          |        |           | Lower         | Upper |                       |
| 444               | 2197     | 124    | 0.97      | 0.68          | 1.38  | .857                  | 2204     | 123    | 0.82      | 0.57          | 1.17  | .276                  |
| 445               | 2196     | 124    | 1.05      | 0.59          | 1.86  | .879                  | 2204     | 124    | 1.01      | 0.57          | 1.80  | .967                  |
| 446               | 2201     | 124    | 1.53      | 1.06          | 2.22  | .025                  | 2208     | 123    | 1.37      | 0.95          | 1.97  | .096                  |
| 447               | 2201     | 124    | 1.36      | 0.96          | 1.94  | .085                  | 2209     | 123    | 1.42      | 1.00          | 2.03  | .052                  |
| 448*              | 2201     | 124    | 2.11      | 1.41          | 3.16  | .000                  | 2208     | 124    | 1.92      | 1.27          | 2.92  | .002                  |
| 449               | 2199     | 124    | 1.22      | 0.84          | 1.76  | .291                  | 2209     | 124    | 0.72      | 0.51          | 1.03  | .074                  |
| 450               | 2199     | 124    | 1.16      | 0.82          | 1.66  | .403                  | 2207     | 124    | 0.77      | 0.54          | 1.09  | .140                  |
| 451               | 2195     | 124    | 1.07      | 0.74          | 1.56  | .713                  | 2204     | 124    | 0.74      | 0.52          | 1.06  | .101                  |
| 452               | 2199     | 124    | 1.32      | 0.90          | 1.93  | .158                  | 2208     | 124    | 0.99      | 0.66          | 1.48  | .951                  |
| 453               | 2199     | 124    | 0.87      | 0.61          | 1.24  | .436                  | 2207     | 124    | 0.84      | 0.59          | 1.20  | .342                  |
| 454               | 2199     | 123    | 1.62      | 1.13          | 2.31  | .008                  | 2206     | 124    | 1.53      | 1.07          | 2.18  | .019                  |
| 455               | 2185     | 123    | 1.09      | 0.76          | 1.55  | .646                  | 2197     | 124    | 0.93      | 0.65          | 1.32  | .674                  |
| 456               | 2189     | 122    | 1.45      | 0.95          | 2.22  | .086                  | 2199     | 124    | 1.35      | 0.88          | 2.09  | .172                  |

| Item <sup>1</sup> | Sample 1 |        |           |               |       |                       | Sample 2 |        |           |               |       |                       |
|-------------------|----------|--------|-----------|---------------|-------|-----------------------|----------|--------|-----------|---------------|-------|-----------------------|
|                   | <i>N</i> | Deaths | <i>HR</i> | 95% <i>CI</i> |       | <i>p</i> <sup>2</sup> | <i>N</i> | Deaths | <i>HR</i> | 95% <i>CI</i> |       | <i>p</i> <sup>2</sup> |
|                   |          |        |           | Lower         | Upper |                       |          |        |           | Lower         | Upper |                       |
| 457               | 2196     | 122    | 0.99      | 0.56          | 1.73  | .971                  | 2208     | 124    | 0.84      | 0.45          | 1.57  | .580                  |
| 458               | 2194     | 123    | 1.29      | 0.90          | 1.83  | .165                  | 2207     | 124    | 1.31      | 0.92          | 1.86  | .139                  |
| 459*              | 2196     | 123    | 2.42      | 1.66          | 3.53  | .000                  | 2198     | 123    | 1.91      | 1.29          | 2.83  | .001                  |
| 460               | 2190     | 123    | 0.79      | 0.52          | 1.20  | .267                  | 2200     | 123    | 0.46      | 0.32          | 0.68  | .000                  |
| 461               | 2197     | 124    | 1.66      | 1.17          | 2.37  | .005                  | 2209     | 124    | 1.23      | 0.86          | 1.75  | .257                  |
| 462               | 2198     | 124    | 0.66      | 0.41          | 1.06  | .086                  | 2209     | 124    | 0.57      | 0.37          | 0.90  | .015                  |
| 463               | 2191     | 124    | 1.08      | 0.75          | 1.54  | .686                  | 2198     | 124    | 0.79      | 0.55          | 1.14  | .206                  |
| 464               | 2196     | 124    | 0.68      | 0.45          | 1.04  | .074                  | 2205     | 124    | 0.78      | 0.52          | 1.18  | .248                  |
| 465               | 2195     | 124    | 1.71      | 1.16          | 2.53  | .007                  | 2200     | 123    | 1.37      | 0.93          | 2.02  | .107                  |
| 466               | 2198     | 124    | 0.71      | 0.49          | 1.03  | .073                  | 2209     | 124    | 0.58      | 0.40          | 0.83  | .003                  |
| 467               | 2200     | 124    | 1.60      | 1.09          | 2.33  | .015                  | 2209     | 124    | 1.17      | 0.78          | 1.75  | .454                  |
| 468               | 2198     | 124    | 1.43      | 1.00          | 2.04  | .049                  | 2206     | 124    | 1.28      | 0.90          | 1.82  | .175                  |
| 469               | 2199     | 124    | 1.56      | 1.05          | 2.32  | .027                  | 2208     | 124    | 1.32      | 0.88          | 1.96  | .175                  |

| Sample 1          |          |        |           |               |       |                       | Sample 2 |        |           |               |       |                       |
|-------------------|----------|--------|-----------|---------------|-------|-----------------------|----------|--------|-----------|---------------|-------|-----------------------|
| Item <sup>1</sup> | <i>N</i> | Deaths | <i>HR</i> | 95% <i>CI</i> |       | <i>p</i> <sup>2</sup> | <i>N</i> | Deaths | <i>HR</i> | 95% <i>CI</i> |       | <i>p</i> <sup>2</sup> |
|                   |          |        |           | Lower         | Upper |                       |          |        |           | Lower         | Upper |                       |
| 470               | 2198     | 124    | 1.08      | 0.40          | 2.93  | .878                  | 2208     | 124    | 1.68      | 0.78          | 3.61  | .182                  |
| 471               | 2113     | 122    | 1.49      | 0.98          | 2.26  | .063                  | 2119     | 120    | 2.30      | 1.57          | 3.37  | .000                  |
| 472               | 2201     | 124    | 1.11      | 0.63          | 1.98  | .715                  | 2209     | 124    | 1.34      | 0.82          | 2.19  | .245                  |
| 473               | 2195     | 124    | 1.16      | 0.81          | 1.66  | .409                  | 2207     | 124    | 1.47      | 1.03          | 2.09  | .034                  |
| 474               | 2197     | 124    | 0.94      | 0.63          | 1.40  | .752                  | 2209     | 124    | 0.77      | 0.52          | 1.13  | .182                  |
| 475               | 2193     | 123    | 1.35      | 0.95          | 1.93  | .096                  | 2197     | 123    | 1.26      | 0.88          | 1.80  | .203                  |
| 476               | 2190     | 122    | 1.09      | 0.62          | 1.92  | .772                  | 2201     | 124    | 1.39      | 0.82          | 2.34  | .225                  |
| 477               | 2183     | 123    | 1.12      | 0.79          | 1.60  | .533                  | 2198     | 123    | 1.34      | 0.94          | 1.92  | .110                  |
| 478               | 2190     | 124    | 0.98      | 0.67          | 1.43  | .908                  | 2200     | 124    | 0.89      | 0.61          | 1.29  | .527                  |
| 479               | 2192     | 124    | 0.90      | 0.57          | 1.44  | .668                  | 2202     | 124    | 0.65      | 0.43          | 0.99  | .042                  |
| 480               | 2192     | 124    | 1.06      | 0.54          | 2.10  | .860                  | 2203     | 124    | 1.26      | 0.69          | 2.29  | .448                  |
| 481               | 2201     | 124    | 1.34      | 0.92          | 1.95  | .127                  | 2210     | 124    | 1.76      | 1.18          | 2.61  | .005                  |
| 482               | 2200     | 124    | 1.62      | 1.11          | 2.36  | .011                  | 2209     | 124    | 1.01      | 0.71          | 1.44  | .944                  |

| Sample 1          |          |        |           |               |       |                       | Sample 2 |        |           |               |       |                       |
|-------------------|----------|--------|-----------|---------------|-------|-----------------------|----------|--------|-----------|---------------|-------|-----------------------|
| Item <sup>1</sup> | <i>N</i> | Deaths | <i>HR</i> | 95% <i>CI</i> |       | <i>p</i> <sup>2</sup> | <i>N</i> | Deaths | <i>HR</i> | 95% <i>CI</i> |       | <i>p</i> <sup>2</sup> |
|                   |          |        |           | Lower         | Upper |                       |          |        |           | Lower         | Upper |                       |
| 483               | 2132     | 120    | 1.06      | 0.68          | 1.63  | .806                  | 2149     | 122    | 0.79      | 0.53          | 1.17  | .238                  |
| 484*              | 2192     | 124    | 2.37      | 1.66          | 3.38  | .000                  | 2204     | 124    | 1.90      | 1.33          | 2.71  | .000                  |
| 485               | 2194     | 123    | 1.75      | 1.22          | 2.51  | .002                  | 2202     | 124    | 1.59      | 1.11          | 2.27  | .011                  |
| 486               | 2200     | 124    | 1.27      | 0.64          | 2.50  | .495                  | 2210     | 124    | 0.76      | 0.45          | 1.29  | .306                  |
| 487*              | 2201     | 124    | 2.14      | 1.48          | 3.11  | .000                  | 2209     | 124    | 1.91      | 1.29          | 2.83  | .001                  |
| 488               | 2194     | 122    | 0.73      | 0.50          | 1.07  | .107                  | 2205     | 124    | 1.03      | 0.72          | 1.49  | .864                  |
| 489               | 2198     | 123    | 0.93      | 0.65          | 1.33  | .696                  | 2206     | 124    | 1.05      | 0.73          | 1.49  | .800                  |
| 490               | 2195     | 122    | 0.72      | 0.40          | 1.27  | .256                  | 2206     | 124    | 0.52      | 0.26          | 1.02  | .058                  |
| 491               | 2181     | 122    | 1.37      | 0.94          | 2.01  | .101                  | 2197     | 123    | 1.61      | 1.12          | 2.33  | .011                  |
| 492               | 2193     | 124    | 1.49      | 1.04          | 2.14  | .032                  | 2208     | 124    | 1.54      | 1.07          | 2.21  | .019                  |
| 493               | 2184     | 124    | 0.90      | 0.63          | 1.28  | .555                  | 2203     | 124    | 1.21      | 0.84          | 1.74  | .306                  |
| 494               | 2198     | 124    | 1.22      | 0.74          | 2.02  | .436                  | 2209     | 124    | 1.78      | 1.15          | 2.75  | .009                  |
| 495               | 2192     | 124    | 0.89      | 0.58          | 1.37  | .606                  | 2203     | 123    | 1.07      | 0.67          | 1.70  | .778                  |

| Sample 1          |          |        |           |               |       |                       | Sample 2 |        |           |               |       |                       |
|-------------------|----------|--------|-----------|---------------|-------|-----------------------|----------|--------|-----------|---------------|-------|-----------------------|
| Item <sup>1</sup> | <i>N</i> | Deaths | <i>HR</i> | 95% <i>CI</i> |       | <i>p</i> <sup>2</sup> | <i>N</i> | Deaths | <i>HR</i> | 95% <i>CI</i> |       | <i>p</i> <sup>2</sup> |
|                   |          |        |           | Lower         | Upper |                       |          |        |           | Lower         | Upper |                       |
| 496               | 2187     | 123    | 0.45      | 0.30          | 0.65  | .000                  | 2198     | 124    | 0.64      | 0.43          | 0.95  | .029                  |
| 497               | 2201     | 124    | 1.24      | 0.51          | 3.05  | .636                  | 2210     | 124    | 0.74      | 0.34          | 1.59  | .436                  |
| 498               | 2199     | 123    | 0.78      | 0.54          | 1.13  | .193                  | 2208     | 124    | 1.37      | 0.91          | 2.06  | .129                  |
| 499               | 2200     | 124    | 1.83      | 1.24          | 2.71  | .003                  | 2208     | 124    | 1.07      | 0.75          | 1.54  | .706                  |
| 500               | 2197     | 124    | 1.35      | 0.94          | 1.92  | .102                  | 2209     | 124    | 1.70      | 1.18          | 2.43  | .004                  |
| 501               | 2200     | 124    | 0.94      | 0.64          | 1.40  | .773                  | 2209     | 124    | 0.88      | 0.60          | 1.30  | .517                  |
| 502               | 2198     | 124    | 1.03      | 0.66          | 1.61  | .912                  | 2209     | 124    | 0.95      | 0.61          | 1.48  | .824                  |
| 503               | 2195     | 124    | 1.09      | 0.77          | 1.56  | .617                  | 2206     | 124    | 1.03      | 0.72          | 1.47  | .855                  |
| 504               | 2189     | 124    | 1.26      | 0.88          | 1.81  | .202                  | 2198     | 122    | 1.02      | 0.71          | 1.47  | .895                  |
| 505               | 2199     | 124    | 2.00      | 1.35          | 2.97  | .001                  | 2208     | 124    | 1.56      | 1.05          | 2.34  | .029                  |
| 506               | 2193     | 124    | 1.60      | 1.11          | 2.28  | .011                  | 2206     | 123    | 1.13      | 0.78          | 1.65  | .525                  |
| 507               | 2196     | 123    | 2.01      | 1.37          | 2.96  | .000                  | 2207     | 123    | 1.25      | 0.87          | 1.79  | .232                  |
| 508               | 2201     | 124    | 0.74      | 0.43          | 1.27  | .269                  | 2210     | 124    | 1.14      | 0.60          | 2.18  | .684                  |

| Item <sup>1</sup> | Sample 1 |        |           |               |       |                       | Sample 2 |        |           |               |       |                       |
|-------------------|----------|--------|-----------|---------------|-------|-----------------------|----------|--------|-----------|---------------|-------|-----------------------|
|                   | <i>N</i> | Deaths | <i>HR</i> | 95% <i>CI</i> |       | <i>p</i> <sup>2</sup> | <i>N</i> | Deaths | <i>HR</i> | 95% <i>CI</i> |       | <i>p</i> <sup>2</sup> |
|                   |          |        |           | Lower         | Upper |                       |          |        |           | Lower         | Upper |                       |
| 509               | 2200     | 124    | 1.24      | 0.86          | 1.79  | .252                  | 2210     | 124    | 1.07      | 0.73          | 1.55  | .737                  |
| 510               | 2193     | 124    | 1.90      | 1.17          | 3.08  | .009                  | 2208     | 123    | 1.71      | 1.03          | 2.85  | .039                  |
| 511               | 2197     | 124    | 1.82      | 1.23          | 2.68  | .003                  | 2206     | 124    | 1.58      | 1.07          | 2.35  | .023                  |
| 512               | 2197     | 123    | 0.96      | 0.42          | 2.19  | .926                  | 2205     | 124    | 1.60      | 0.86          | 2.99  | .136                  |
| 513               | 2143     | 122    | 1.17      | 0.81          | 1.69  | .390                  | 2148     | 120    | 0.84      | 0.58          | 1.22  | .356                  |
| 514               | 2172     | 121    | 1.18      | 0.67          | 2.10  | .565                  | 2187     | 123    | 1.67      | 1.02          | 2.74  | .041                  |
| 515               | 2199     | 124    | 0.69      | 0.41          | 1.17  | .170                  | 2206     | 124    | 0.64      | 0.38          | 1.07  | .087                  |
| 516               | 2199     | 124    | 1.19      | 0.81          | 1.75  | .379                  | 2206     | 124    | 1.66      | 1.09          | 2.52  | .018                  |
| 517*              | 2200     | 124    | 2.63      | 1.28          | 5.41  | .008                  | 2206     | 124    | 2.48      | 1.26          | 4.90  | .009                  |
| 518*              | 2192     | 123    | 1.70      | 1.16          | 2.49  | .007                  | 2204     | 123    | 1.67      | 1.14          | 2.44  | .008                  |
| 519               | 2199     | 124    | 0.80      | 0.30          | 2.18  | .668                  | 2204     | 123    | 1.60      | 0.78          | 3.28  | .201                  |
| 520               | 2193     | 124    | 1.10      | 0.74          | 1.64  | .647                  | 2205     | 124    | 1.28      | 0.85          | 1.92  | .234                  |
| 521               | 2200     | 124    | 0.70      | 0.49          | 1.01  | .054                  | 2208     | 123    | 0.87      | 0.60          | 1.25  | .449                  |



| Item <sup>1</sup> | Sample 1 |        |           |               |       |                       | Sample 2 |        |           |               |       |                       |
|-------------------|----------|--------|-----------|---------------|-------|-----------------------|----------|--------|-----------|---------------|-------|-----------------------|
|                   | <i>N</i> | Deaths | <i>HR</i> | 95% <i>CI</i> |       | <i>p</i> <sup>2</sup> | <i>N</i> | Deaths | <i>HR</i> | 95% <i>CI</i> |       | <i>p</i> <sup>2</sup> |
|                   |          |        |           | Lower         | Upper |                       |          |        |           | Lower         | Upper |                       |
| 522               | 2200     | 124    | 1.07      | 0.74          | 1.55  | .703                  | 2207     | 122    | 1.06      | 0.74          | 1.53  | .751                  |
| 523               | 2201     | 124    | 1.47      | 1.03          | 2.09  | .034                  | 2208     | 123    | 1.21      | 0.85          | 1.73  | .281                  |
| 524               | 2199     | 124    | 0.76      | 0.51          | 1.14  | .189                  | 2207     | 122    | 0.97      | 0.62          | 1.51  | .897                  |
| 525               | 2201     | 124    | 1.33      | 0.93          | 1.91  | .119                  | 2206     | 123    | 1.14      | 0.80          | 1.64  | .461                  |
| 526*              | 2200     | 124    | 2.17      | 1.26          | 3.74  | .005                  | 2207     | 122    | 3.23      | 2.01          | 5.19  | .000                  |
| 527               | 2200     | 124    | 0.73      | 0.47          | 1.11  | .142                  | 2210     | 124    | 0.70      | 0.47          | 1.06  | .090                  |
| 528               | 2195     | 123    | 0.84      | 0.55          | 1.28  | .423                  | 2208     | 124    | 0.86      | 0.56          | 1.32  | .484                  |
| 529               | 2192     | 124    | 1.24      | 0.86          | 1.79  | .245                  | 2208     | 124    | 1.44      | 0.99          | 2.09  | .059                  |
| 530               | 2199     | 124    | 0.92      | 0.57          | 1.51  | .753                  | 2208     | 124    | 1.19      | 0.75          | 1.87  | .457                  |
| 531               | 2197     | 124    | 1.68      | 1.14          | 2.48  | .009                  | 2208     | 124    | 1.14      | 0.75          | 1.73  | .552                  |
| 532               | 2197     | 124    | 0.77      | 0.48          | 1.23  | .271                  | 2204     | 124    | 0.62      | 0.40          | 0.95  | .029                  |
| 533               | 2197     | 124    | 0.87      | 0.58          | 1.30  | .493                  | 2207     | 123    | 0.74      | 0.50          | 1.09  | .132                  |
| 534               | 2190     | 124    | 1.05      | 0.73          | 1.53  | .782                  | 2202     | 123    | 1.08      | 0.74          | 1.57  | .702                  |

| Sample 1          |          |        |           |               |       |                       | Sample 2 |        |           |               |       |                       |
|-------------------|----------|--------|-----------|---------------|-------|-----------------------|----------|--------|-----------|---------------|-------|-----------------------|
| Item <sup>1</sup> | <i>N</i> | Deaths | <i>HR</i> | 95% <i>CI</i> |       | <i>p</i> <sup>2</sup> | <i>N</i> | Deaths | <i>HR</i> | 95% <i>CI</i> |       | <i>p</i> <sup>2</sup> |
|                   |          |        |           | Lower         | Upper |                       |          |        |           | Lower         | Upper |                       |
| 535*              | 2201     | 124    | 2.75      | 1.75          | 4.31  | .000                  | 2209     | 123    | 1.90      | 1.18          | 3.05  | .008                  |
| 536*              | 2197     | 124    | 2.29      | 1.51          | 3.47  | .000                  | 2208     | 124    | 1.70      | 1.14          | 2.52  | .009                  |
| 537               | 2201     | 124    | 1.51      | 1.02          | 2.21  | .038                  | 2209     | 124    | 1.21      | 0.81          | 1.80  | .355                  |
| 538               | 2199     | 124    | 1.12      | 0.45          | 2.75  | .810                  | 2209     | 124    | 1.14      | 0.46          | 2.82  | .775                  |
| 539               | 2199     | 124    | 1.02      | 0.60          | 1.73  | .946                  | 2210     | 124    | 0.63      | 0.39          | 1.01  | .055                  |
| 540               | 2201     | 124    | 1.04      | 0.42          | 2.55  | .934                  | 2209     | 124    | 1.52      | 0.56          | 4.13  | .413                  |
| 541               | 2201     | 124    | 1.75      | 1.17          | 2.62  | .007                  | 2209     | 124    | 1.27      | 0.83          | 1.93  | .276                  |
| 542               | 2197     | 124    | 0.56      | 0.38          | 0.81  | .003                  | 2204     | 124    | 0.83      | 0.55          | 1.25  | .368                  |
| 543*              | 2200     | 124    | 2.71      | 1.74          | 4.22  | .000                  | 2207     | 124    | 2.67      | 1.71          | 4.17  | .000                  |
| 544               | 2197     | 123    | 1.77      | 1.21          | 2.58  | .003                  | 2208     | 124    | 1.62      | 1.12          | 2.35  | .011                  |
| 545               | 2199     | 124    | 1.25      | 0.85          | 1.84  | .259                  | 2210     | 124    | 2.20      | 1.54          | 3.14  | .000                  |
| 546               | 2200     | 124    | 1.09      | 0.73          | 1.63  | .663                  | 2208     | 124    | 1.17      | 0.79          | 1.73  | .442                  |
| 547               | 2198     | 124    | 1.18      | 0.81          | 1.70  | .392                  | 2207     | 124    | 0.92      | 0.64          | 1.32  | .645                  |

| Item <sup>1</sup> | Sample 1 |        |           |               |       |                       | Sample 2 |        |           |               |       |                       |
|-------------------|----------|--------|-----------|---------------|-------|-----------------------|----------|--------|-----------|---------------|-------|-----------------------|
|                   | <i>N</i> | Deaths | <i>HR</i> | 95% <i>CI</i> |       | <i>p</i> <sup>2</sup> | <i>N</i> | Deaths | <i>HR</i> | 95% <i>CI</i> |       | <i>p</i> <sup>2</sup> |
|                   |          |        |           | Lower         | Upper |                       |          |        |           | Lower         | Upper |                       |
| 548               | 2199     | 124    | 1.07      | 0.71          | 1.61  | .755                  | 2207     | 124    | 0.82      | 0.52          | 1.28  | .384                  |
| 549               | 2200     | 124    | 1.50      | 0.98          | 2.29  | .064                  | 2206     | 123    | 1.58      | 1.04          | 2.40  | .031                  |
| 550               | 2194     | 124    | 0.75      | 0.53          | 1.07  | .113                  | 2204     | 123    | 0.94      | 0.66          | 1.35  | .748                  |
| 551               | 2200     | 124    | 1.54      | 1.07          | 2.21  | .019                  | 2210     | 124    | 1.20      | 0.83          | 1.74  | .330                  |
| 552               | 2197     | 124    | 1.06      | 0.72          | 1.57  | .762                  | 2209     | 124    | 1.23      | 0.82          | 1.85  | .318                  |
| 553               | 2201     | 124    | 2.45      | 1.30          | 4.60  | .005                  | 2210     | 124    | 1.56      | 0.73          | 3.36  | .252                  |
| 554               | 2195     | 124    | 1.04      | 0.73          | 1.48  | .836                  | 2207     | 124    | 0.93      | 0.65          | 1.32  | .682                  |
| 555*              | 2200     | 124    | 2.16      | 1.51          | 3.10  | .000                  | 2209     | 124    | 2.02      | 1.41          | 2.91  | .000                  |
| 556               | 2198     | 124    | 1.09      | 0.74          | 1.60  | .650                  | 2207     | 124    | 1.04      | 0.72          | 1.52  | .828                  |
| 557               | 2197     | 124    | 1.97      | 0.92          | 4.24  | .082                  | 2210     | 124    | 1.46      | 0.59          | 3.59  | .408                  |
| 558               | 2178     | 120    | 1.33      | 0.92          | 1.93  | .130                  | 2192     | 123    | 1.23      | 0.86          | 1.77  | .257                  |
| 559               | 2198     | 124    | 1.75      | 1.11          | 2.75  | .015                  | 2210     | 124    | 2.00      | 1.30          | 3.08  | .002                  |
| 560               | 2200     | 124    | 2.32      | 1.63          | 3.31  | .000                  | 2208     | 124    | 1.40      | 0.98          | 2.00  | .066                  |

| Item <sup>1</sup> | Sample 1 |        |           |               |       |                       | Sample 2 |        |           |               |       |                       |
|-------------------|----------|--------|-----------|---------------|-------|-----------------------|----------|--------|-----------|---------------|-------|-----------------------|
|                   | <i>N</i> | Deaths | <i>HR</i> | 95% <i>CI</i> |       | <i>p</i> <sup>2</sup> | <i>N</i> | Deaths | <i>HR</i> | 95% <i>CI</i> |       | <i>p</i> <sup>2</sup> |
|                   |          |        |           | Lower         | Upper |                       |          |        |           | Lower         | Upper |                       |
| 561               | 2197     | 124    | 1.78      | 1.23          | 2.58  | .002                  | 2204     | 124    | 1.16      | 0.81          | 1.66  | .407                  |
| 562               | 2179     | 122    | 1.20      | 0.83          | 1.73  | .341                  | 2195     | 123    | 1.31      | 0.91          | 1.89  | .145                  |
| 563               | 2198     | 124    | 2.05      | 0.95          | 4.42  | .067                  | 2208     | 124    | 1.19      | 0.62          | 2.28  | .606                  |
| 564               | 2197     | 123    | 1.21      | 0.84          | 1.75  | .303                  | 2208     | 124    | 0.86      | 0.59          | 1.26  | .444                  |
| 565               | 2199     | 124    | 0.86      | 0.38          | 1.97  | .729                  | 2208     | 124    | 1.84      | 1.03          | 3.28  | .039                  |
| 566               | 2193     | 124    | 0.86      | 0.60          | 1.25  | .432                  | 2206     | 124    | 1.19      | 0.81          | 1.75  | .370                  |

*Note.* <sup>1</sup>Item number for the 1943 Minnesota Multiphasic Personality Inventory. <sup>2</sup>*p*-values of .000 indicate  $p < .001$ . \* Item was significant at  $p < .01$  in both samples. *N* = Sample size. Deaths = number of deaths. *HR* = hazard ratio. 95% *CI* = 95% confidence interval.

Table S10

*Cox regression of Somatic Complaints as a predictor of all-cause mortality when controlling for age, ethnicity, the covariates, and Personal Disturbance*

| Predictor                                   | HR   | 95% CI |       | p    |
|---------------------------------------------|------|--------|-------|------|
|                                             |      | lower  | upper |      |
| Age                                         | 1.06 | 1.01   | 1.12  | .024 |
| Ethnic group                                |      |        |       |      |
| Black vs. White                             | 1.43 | 0.98   | 2.10  | .067 |
| Other vs. White                             | 1.37 | 0.86   | 2.18  | .187 |
| Marital status                              |      |        |       |      |
| Divorced/separated/widowed vs. Married      | 1.50 | 1.09   | 2.06  | .012 |
| Never married vs. Married                   | 2.04 | 1.38   | 3.01  | .000 |
| Total Army General Technical Test (z-score) | 1.12 | 0.95   | 1.32  | .191 |
| Family income                               |      |        |       |      |
| \$20,001-\$40,000 vs. ≤ \$20,000            | 0.95 | 0.70   | 1.28  | .725 |
| > \$40,000 vs. ≤ \$20,000                   | 0.56 | 0.34   | 0.95  | .030 |
| Educational achievement                     |      |        |       |      |
| 9-12 years vs. ≤ 8 years                    | 1.09 | 0.52   | 2.29  | .820 |
| 13-16 years vs. ≤ 8 years                   | 0.77 | 0.35   | 1.68  | .505 |
| 17-18 years vs. ≤ 8 years                   | 0.87 | 0.32   | 2.35  | .781 |
| Pulse rate/minute (z-score)                 | 1.21 | 1.07   | 1.38  | .003 |
| Somatic conditions present vs. absent       | 1.49 | 1.08   | 2.07  | .017 |
| Systolic blood pressure (z-score)           | 1.05 | 0.88   | 1.24  | .594 |
| Diastolic blood pressure (z-score)          | 1.01 | 0.84   | 1.20  | .956 |
| Blood glucose (mg/dl) (z-score)             | 1.11 | 1.05   | 1.18  | .001 |

| Predictor                                       | <i>HR</i> | 95% <i>CI</i> |       | <i>p</i> |
|-------------------------------------------------|-----------|---------------|-------|----------|
|                                                 |           | lower         | upper |          |
| FEV <sub>1</sub> (z-score)                      | 0.86      | 0.75          | 0.98  | .024     |
| Body mass index                                 |           |               |       |          |
| Overweight (25-30) vs. Normal (< 25)            | 0.75      | 0.55          | 1.01  | .061     |
| Obese (>30) vs. Normal (< 25)                   | 1.07      | 0.73          | 1.57  | .732     |
| Major depression present vs. absent             | 0.85      | 0.55          | 1.32  | .474     |
| Generalized anxiety disorder present vs. absent | 1.02      | 0.70          | 1.49  | .905     |
| Drinking                                        |           |               |       |          |
| Nondrinker vs. Never drinker                    | 1.42      | 0.78          | 2.59  | .254     |
| Never binges vs. Never drinker                  | 0.99      | 0.55          | 1.79  | .972     |
| 1 binge/month vs. Never drinker                 | 1.33      | 0.74          | 2.40  | .340     |
| 2-7 binges/month vs. Never drinker              | 1.23      | 0.63          | 2.39  | .549     |
| ≥ 8 binges/month vs. Never drinker              | 1.87      | 1.00          | 3.49  | .049     |
| Smoking                                         |           |               |       |          |
| Former smoker vs. Non-smoker                    | 0.92      | 0.60          | 1.41  | .693     |
| Current Smoker vs. Non-smoker                   | 1.33      | 0.93          | 1.92  | .123     |
| Personal Disturbance (z-score)                  | 1.29      | 1.07          | 1.55  | .008     |
| Somatic Complaints (z-score)                    | 1.23      | 1.05          | 1.44  | .010     |

*Note.* 95% *CI* = 95% confidence interval. *HR* = hazard ratio.

Table S11

*Cox regression of Psychotic/Paranoid as a predictor of all-cause mortality when controlling for age, ethnicity, the covariates, and Personal Disturbance*

| Predictor                                   | HR   | 95% CI |       | p    |
|---------------------------------------------|------|--------|-------|------|
|                                             |      | lower  | upper |      |
| Age                                         | 1.06 | 1.01   | 1.12  | .016 |
| Ethnic group                                |      |        |       |      |
| Black vs. White                             | 1.48 | 1.01   | 2.17  | .046 |
| Other vs. White                             | 1.42 | 0.89   | 2.27  | .143 |
| Marital status                              |      |        |       |      |
| Divorced/separated/widowed vs. Married      | 1.45 | 1.06   | 1.99  | .022 |
| Never married vs. Married                   | 1.99 | 1.35   | 2.95  | .001 |
| Total Army General Technical Test (z-score) | 1.09 | 0.92   | 1.29  | .334 |
| Family income                               |      |        |       |      |
| \$20,001-\$40,000 vs. ≤ \$20,000            | 0.93 | 0.69   | 1.25  | .607 |
| > \$40,000 vs. ≤ \$20,000                   | 0.56 | 0.33   | 0.94  | .027 |
| Educational achievement                     |      |        |       |      |
| 9-12 years vs. ≤ 8 years                    | 1.08 | 0.51   | 2.25  | .849 |
| 13-16 years vs. ≤ 8 years                   | 0.78 | 0.35   | 1.70  | .524 |
| 17-18 years vs. ≤ 8 years                   | 0.91 | 0.33   | 2.46  | .844 |
| Pulse rate/minute (z-score)                 | 1.21 | 1.07   | 1.38  | .003 |
| Somatic conditions present vs. absent       | 1.55 | 1.12   | 2.14  | .008 |
| Systolic blood pressure (z-score)           | 1.04 | 0.88   | 1.24  | .627 |
| Diastolic blood pressure (z-score)          | 1.01 | 0.85   | 1.20  | .910 |
| Blood glucose (mg/dl) (z-score)             | 1.11 | 1.04   | 1.18  | .001 |

| Predictor                                       | <i>HR</i> | 95% <i>CI</i> |       | <i>p</i> |
|-------------------------------------------------|-----------|---------------|-------|----------|
|                                                 |           | lower         | upper |          |
| FEV <sub>1</sub> (z-score)                      | 0.85      | 0.75          | 0.98  | .020     |
| Body mass index                                 |           |               |       |          |
| Overweight (25-30) vs. Normal (< 25)            | 0.74      | 0.55          | 1.00  | .048     |
| Obese (>30) vs. Normal (< 25)                   | 1.06      | 0.72          | 1.55  | .780     |
| Major depression present vs. absent             | 0.88      | 0.57          | 1.36  | .565     |
| Generalized anxiety disorder present vs. absent | 1.06      | 0.73          | 1.53  | .772     |
| Drinking                                        |           |               |       |          |
| Nondrinker vs. Never drinker                    | 1.40      | 0.76          | 2.55  | .278     |
| Never binges vs. Never drinker                  | 0.97      | 0.54          | 1.75  | .910     |
| 1 binge/month vs. Never drinker                 | 1.30      | 0.72          | 2.34  | .382     |
| 2-7 binges/month vs. Never drinker              | 1.18      | 0.61          | 2.31  | .624     |
| ≥ 8 binges/month vs. Never drinker              | 1.75      | 0.94          | 3.28  | .080     |
| Smoking                                         |           |               |       |          |
| Former smoker vs. Non-smoker                    | 0.92      | 0.60          | 1.40  | .684     |
| Current Smoker vs. Non-smoker                   | 1.29      | 0.89          | 1.86  | .180     |
| Personal Disturbance (z-score)                  | 1.80      | 1.44          | 2.25  | < .001   |
| Psychotic/Paranoid (z-score)                    | 0.85      | 0.70          | 1.03  | .088     |

Note. 95% *CI* = 95% confidence interval. *HR* = hazard ratio.



Table S12

*Cox regression of Antisocial as a predictor of all-cause mortality when controlling for age, ethnicity, the covariates, and Personal Disturbance*

| Predictor                                   | HR   | 95% CI |       | p    |
|---------------------------------------------|------|--------|-------|------|
|                                             |      | lower  | upper |      |
| Age                                         | 1.07 | 1.01   | 1.12  | .015 |
| Ethnic group                                |      |        |       |      |
| Black vs. White                             | 1.41 | 0.96   | 2.07  | .076 |
| Other vs. White                             | 1.33 | 0.84   | 2.12  | .230 |
| Marital status                              |      |        |       |      |
| Divorced/separated/widowed vs. Married      | 1.46 | 1.06   | 2.00  | .019 |
| Never married vs. Married                   | 1.96 | 1.33   | 2.90  | .001 |
| Total Army General Technical Test (z-score) | 1.13 | 0.95   | 1.33  | .167 |
| Family income                               |      |        |       |      |
| \$20,001-\$40,000 vs. ≤ \$20,000            | 0.92 | 0.68   | 1.24  | .567 |
| > \$40,000 vs. ≤ \$20,000                   | 0.55 | 0.33   | 0.92  | .024 |
| Educational achievement                     |      |        |       |      |
| 9-12 years vs. ≤ 8 years                    | 1.05 | 0.50   | 2.21  | .893 |
| 13-16 years vs. ≤ 8 years                   | 0.75 | 0.34   | 1.65  | .479 |
| 17-18 years vs. ≤ 8 years                   | 0.85 | 0.31   | 2.29  | .747 |
| Pulse rate/minute (z-score)                 | 1.22 | 1.07   | 1.39  | .003 |
| Somatic conditions present vs. absent       | 1.57 | 1.13   | 2.17  | .007 |
| Systolic blood pressure (z-score)           | 1.03 | 0.87   | 1.22  | .723 |
| Diastolic blood pressure (z-score)          | 1.02 | 0.86   | 1.22  | .819 |
| Blood glucose (mg/dl) (z-score)             | 1.11 | 1.04   | 1.18  | .001 |

| Predictor                                       | <i>HR</i> | 95% <i>CI</i> |       | <i>p</i> |
|-------------------------------------------------|-----------|---------------|-------|----------|
|                                                 |           | lower         | upper |          |
| FEV <sub>1</sub> (z-score)                      | 0.85      | 0.75          | 0.98  | .020     |
| Body mass index                                 |           |               |       |          |
| Overweight (25-30) vs. Normal (< 25)            | 0.73      | 0.54          | 0.99  | .041     |
| Obese (>30) vs. Normal (< 25)                   | 1.06      | 0.73          | 1.55  | .760     |
| Major depression present vs. absent             | 0.89      | 0.58          | 1.39  | .615     |
| Generalized anxiety disorder present vs. absent | 1.08      | 0.75          | 1.57  | .685     |
| Drinking                                        |           |               |       |          |
| Nondrinker vs. Never drinker                    | 1.44      | 0.79          | 2.62  | .238     |
| Never binges vs. Never drinker                  | 0.99      | 0.55          | 1.78  | .965     |
| 1 binge/month vs. Never drinker                 | 1.31      | 0.73          | 2.36  | .374     |
| 2-7 binges/month vs. Never drinker              | 1.21      | 0.62          | 2.36  | .576     |
| ≥ 8 binges/month vs. Never drinker              | 1.78      | 0.95          | 3.34  | .071     |
| Smoking                                         |           |               |       |          |
| Former smoker vs. Non-smoker                    | 0.92      | 0.60          | 1.40  | .682     |
| Current Smoker vs. Non-smoker                   | 1.29      | 0.89          | 1.86  | .185     |
| Personal Disturbance (z-score)                  | 1.42      | 1.19          | 1.69  | < .001   |
| Antisocial (z-score)                            | 1.13      | 0.94          | 1.36  | .199     |

*Note.* 95% *CI* = 95% confidence interval. *HR* = hazard ratio.

Table S13

*Cox regression of all four personality components' associations with all-cause mortality after controlling for age and ethnicity*

| Predictors                       | 95% CI    |       |       | <i>p</i> |
|----------------------------------|-----------|-------|-------|----------|
|                                  | <i>HR</i> | lower | upper |          |
| Age                              | 1.09      | 1.03  | 1.14  | .001     |
| Ethnic group                     |           |       |       |          |
| Black vs. White                  | 1.72      | 1.24  | 2.39  | .001     |
| Black vs. other                  | 1.33      | 0.85  | 2.09  | .215     |
| Components (z-scores)            |           |       |       |          |
| Neuroticism/Negative Affectivity | 0.96      | 0.81  | 1.13  | .603     |
| Somatic Complaints               | 1.51      | 1.34  | 1.71  | < .001   |
| Psychotic/Paranoid               | 0.97      | 0.85  | 1.10  | .615     |
| Antisocial                       | 1.54      | 1.33  | 1.79  | < .001   |

*Note.* Effects for the components are per standard deviation. 95% CI = 95% confidence interval. *HR* = hazard ratio.

Table S14

*Cox regression of all four personality components' association with all-cause mortality after controlling for age, ethnicity, and the covariates*

| Predictor                                   | HR   | 95% CI |       | p      |
|---------------------------------------------|------|--------|-------|--------|
|                                             |      | lower  | upper |        |
| Age                                         | 1.07 | 1.01   | 1.12  | .012   |
| Ethnic group                                |      |        |       |        |
| Black vs. White                             | 1.38 | 0.93   | 2.03  | .107   |
| Other vs. White                             | 1.31 | 0.82   | 2.11  | .257   |
| Marital status                              |      |        |       |        |
| Divorced/separated/widowed vs. Married      | 1.50 | 1.09   | 2.06  | .013   |
| Never married vs. Married                   | 2.02 | 1.37   | 2.99  | < .001 |
| Total Army General Technical Test (z-score) | 1.14 | 0.96   | 1.36  | .127   |
| Family income                               |      |        |       |        |
| \$20,001-\$40,000 vs. ≤ \$20,000            | 0.94 | 0.70   | 1.27  | .675   |
| > \$40,000 vs. ≤ \$20,000                   | 0.55 | 0.33   | 0.93  | .025   |
| Educational achievement                     |      |        |       |        |
| 9-12 years vs. ≤ 8 years                    | 1.06 | 0.50   | 2.22  | .884   |
| 13-16 years vs. ≤ 8 years                   | 0.76 | 0.35   | 1.67  | .497   |
| 17-18 years vs. ≤ 8 years                   | 0.89 | 0.33   | 2.41  | .813   |
| Pulse rate/minute (z-score)                 | 1.23 | 1.08   | 1.40  | .002   |
| Somatic conditions present vs. absent       | 1.45 | 1.05   | 2.02  | .026   |
| Systolic blood pressure (z-score)           | 1.04 | 0.87   | 1.23  | .691   |
| Diastolic blood pressure (z-score)          | 1.01 | 0.85   | 1.21  | .873   |
| Blood glucose (mg/dl) (z-score)             | 1.10 | 1.03   | 1.17  | .003   |

| Predictor                                       | <i>HR</i> | 95% <i>CI</i> |       | <i>p</i> |
|-------------------------------------------------|-----------|---------------|-------|----------|
|                                                 |           | lower         | upper |          |
| FEV <sub>1</sub> (z-score)                      | 0.86      | 0.75          | 0.98  | .027     |
| Body mass index                                 |           |               |       |          |
| Overweight (25-30) vs. Normal (< 25)            | 0.74      | 0.55          | 1.00  | .051     |
| Obese (>30) vs. Normal (< 25)                   | 1.08      | 0.73          | 1.58  | .710     |
| Major depression present vs. absent             | 0.94      | 0.61          | 1.47  | .788     |
| Generalized anxiety disorder present vs. absent | 1.07      | 0.73          | 1.56  | .729     |
| Drinking                                        |           |               |       |          |
| Nondrinker vs. Never drinker                    | 1.36      | 0.75          | 2.50  | .314     |
| Never binges vs. Never drinker                  | 0.95      | 0.52          | 1.71  | .857     |
| 1 binge/month vs. Never drinker                 | 1.22      | 0.68          | 2.21  | .502     |
| 2-7 binges/month vs. Never drinker              | 1.11      | 0.57          | 2.17  | .758     |
| ≥ 8 binges/month vs. Never drinker              | 1.66      | 0.89          | 3.12  | .113     |
| Smoking                                         |           |               |       |          |
| Former smoker vs. Non-smoker                    | 0.89      | 0.58          | 1.36  | .584     |
| Current Smoker vs. Non-smoker                   | 1.21      | 0.84          | 1.76  | .314     |
| Components (z-scores)                           |           |               |       |          |
| Neuroticism/Negative Affectivity                | 0.91      | 0.77          | 1.09  | .318     |
| Somatic Complaints                              | 1.39      | 1.22          | 1.58  | < .001   |
| Psychotic/Paranoid                              | 1.03      | 0.90          | 1.19  | .669     |
| Antisocial                                      | 1.36      | 1.16          | 1.59  | < .001   |

*Note.* Effects for the components are per standard deviation. 95% *CI* = 95% confidence interval. *HR* = hazard ratio.

Table S2

*Promax rotated components of the 89 items associated with mortality risk*

| Item <sup>1</sup> | Components                       |                                 |                    |            | $h^2$ |
|-------------------|----------------------------------|---------------------------------|--------------------|------------|-------|
|                   | Neuroticism/Negative Affectivity | Somatic Complaints <sup>2</sup> | Psychotic/Paranoid | Antisocial |       |
| 418               | <b>.65</b>                       | -.08                            | .12                | -.05       | .43   |
| 142               | <b>.64</b>                       | -.02                            | -.04               | .04        | .40   |
| 259               | <b>.63</b>                       | .02                             | -.12               | -.03       | .32   |
| 379               | <b>-.60</b>                      | -.10                            | -.03               | .13        | .38   |
| 397               | <b>.59</b>                       | -.09                            | -.05               | .17        | .39   |
| 305               | <b>.57</b>                       | .01                             | .13                | -.04       | .41   |
| 301               | <b>.56</b>                       | .02                             | .22                | -.13       | .44   |
| 555               | <b>.56</b>                       | .07                             | .11                | .01        | .46   |
| 8                 | <b>-.54</b>                      | -.13                            | .06                | .14        | .27   |
| 396               | <b>.50</b>                       | -.04                            | .13                | .11        | .39   |
| 431               | <b>.49</b>                       | -.09                            | .11                | .13        | .35   |
| 487               | <b>.49</b>                       | -.15                            | .18                | .08        | .33   |

| Components        |                                  |                                 |                    |            |                       |  |
|-------------------|----------------------------------|---------------------------------|--------------------|------------|-----------------------|--|
| Item <sup>1</sup> | Neuroticism/Negative Affectivity | Somatic Complaints <sup>2</sup> | Psychotic/Paranoid | Antisocial | <i>h</i> <sup>2</sup> |  |
| 76                | <b>.48</b>                       | .10                             | <b>.33</b>         | -.22       | .46                   |  |
| 442               | <b>.46</b>                       | .09                             | -.21               | .11        | .23                   |  |
| 317               | <b>.45</b>                       | -.11                            | .04                | .00        | .18                   |  |
| 389               | <b>.43</b>                       | -.10                            | .20                | .16        | .39                   |  |
| 41                | <b>.43</b>                       | .22                             | -.12               | .11        | .34                   |  |
| 335               | <b>.39</b>                       | .06                             | .19                | .00        | .31                   |  |
| 448               | <b>.35</b>                       | -.06                            | .16                | .07        | .22                   |  |
| 46                | <b>-.35</b>                      | -.25                            | .02                | .16        | .20                   |  |
| 439               | <b>.34</b>                       | -.01                            | -.12               | <b>.32</b> | .26                   |  |
| 152               | <b>-.33</b>                      | -.25                            | .13                | -.07       | .24                   |  |
| 158               | <b>.32</b>                       | .08                             | .05                | -.07       | .14                   |  |
| 307               | <b>.32</b>                       | -.10                            | .02                | .12        | .14                   |  |
| 238               | .29                              | .16                             | -.09               | .29        | .31                   |  |
| 61                | .21                              | .05                             | .17                | .16        | .23                   |  |

| Components        |                                  |                                 |                    |            |       |  |
|-------------------|----------------------------------|---------------------------------|--------------------|------------|-------|--|
| Item <sup>1</sup> | Neuroticism/Negative Affectivity | Somatic Complaints <sup>2</sup> | Psychotic/Paranoid | Antisocial | $h^2$ |  |
| 159               | .21                              | .15                             | .14                | .07        | .21   |  |
| 243               | -.09                             | <b>-.67</b>                     | .15                | -.01       | .43   |  |
| 153               | .04                              | <b>-.63</b>                     | -.11               | .09        | .40   |  |
| 51                | -.05                             | <b>-.61</b>                     | .08                | .11        | .32   |  |
| 103               | .12                              | <b>-.59</b>                     | -.04               | -.09       | .35   |  |
| 9                 | -.07                             | <b>-.57</b>                     | .01                | .14        | .31   |  |
| 62                | -.04                             | <b>.54</b>                      | -.06               | .25        | .39   |  |
| 273               | -.11                             | <b>.54</b>                      | -.07               | .14        | .27   |  |
| 55                | .00                              | <b>-.51</b>                     | .05                | -.06       | .26   |  |
| 175               | .09                              | <b>-.49</b>                     | -.15               | -.02       | .30   |  |
| 44                | -.11                             | <b>.48</b>                      | .28                | -.06       | .34   |  |
| 47                | -.16                             | <b>.46</b>                      | .21                | .11        | .32   |  |
| 72                | .08                              | <b>.42</b>                      | .08                | -.04       | .25   |  |
| 23                | -.06                             | <b>.40</b>                      | .11                | -.05       | .17   |  |



| Components        |                                  |                                 |                    |            |                       |  |
|-------------------|----------------------------------|---------------------------------|--------------------|------------|-----------------------|--|
| Item <sup>1</sup> | Neuroticism/Negative Affectivity | Somatic Complaints <sup>2</sup> | Psychotic/Paranoid | Antisocial | <i>h</i> <sup>2</sup> |  |
| 43                | .13                              | <b>.39</b>                      | .09                | .06        | .33                   |  |
| 163               | <b>-.30</b>                      | <b>-.38</b>                     | .17                | -.01       | .27                   |  |
| 114               | -.05                             | <b>.38</b>                      | <b>.34</b>         | -.04       | .34                   |  |
| 186               | .07                              | <b>.35</b>                      | .10                | .09        | .26                   |  |
| 31                | -.01                             | <b>.33</b>                      | .24                | .04        | .27                   |  |
| 187               | .00                              | -.29                            | -.13               | .02        | .13                   |  |
| 251               | .06                              | .26                             | .21                | .09        | .25                   |  |
| 34                | .00                              | .24                             | -.06               | .20        | .12                   |  |
| 154               | .02                              | -.23                            | -.11               | .02        | .08                   |  |
| 35                | -.14                             | .00                             | <b>.61</b>         | -.02       | .29                   |  |
| 16                | .04                              | .03                             | <b>.58</b>         | -.04       | .36                   |  |
| 526               | .21                              | -.04                            | <b>.55</b>         | -.18       | .34                   |  |
| 543               | .13                              | .05                             | <b>.54</b>         | -.04       | .40                   |  |
| 157               | .03                              | .00                             | <b>.53</b>         | .13        | .39                   |  |

| Components        |                                  |                                 |                    |            |                       |  |
|-------------------|----------------------------------|---------------------------------|--------------------|------------|-----------------------|--|
| Item <sup>1</sup> | Neuroticism/Negative Affectivity | Somatic Complaints <sup>2</sup> | Psychotic/Paranoid | Antisocial | <i>h</i> <sup>2</sup> |  |
| 110               | -.05                             | .02                             | <b>.53</b>         | .01        | .27                   |  |
| 345               | .06                              | .03                             | <b>.48</b>         | .13        | .38                   |  |
| 350               | -.07                             | .10                             | <b>.43</b>         | .11        | .27                   |  |
| 182               | .20                              | .11                             | <b>.41</b>         | -.06       | .34                   |  |
| 168               | .25                              | .15                             | <b>.38</b>         | -.11       | .36                   |  |
| 395               | .11                              | -.09                            | <b>.37</b>         | .19        | .28                   |  |
| 344               | .09                              | -.04                            | <b>.37</b>         | .10        | .21                   |  |
| 517               | .11                              | .00                             | <b>.36</b>         | -.18       | .13                   |  |
| 48                | -.04                             | .11                             | <b>.34</b>         | .04        | .17                   |  |
| 358               | .03                              | .01                             | <b>.34</b>         | .28        | .31                   |  |
| 139               | .15                              | .05                             | <b>.32</b>         | .08        | .26                   |  |
| 265               | .16                              | -.10                            | .25                | .21        | .23                   |  |
| 535               | -.08                             | .22                             | .22                | .12        | .17                   |  |
| 386               | -.09                             | -.10                            | .12                | <b>.52</b> | .26                   |  |

| Components        |                                  |                                 |                    |             |                       |  |
|-------------------|----------------------------------|---------------------------------|--------------------|-------------|-----------------------|--|
| Item <sup>1</sup> | Neuroticism/Negative Affectivity | Somatic Complaints <sup>2</sup> | Psychotic/Paranoid | Antisocial  | <i>h</i> <sup>2</sup> |  |
| 294               | .04                              | -.15                            | <b>.31</b>         | <b>-.49</b> | .20                   |  |
| 28                | .02                              | -.04                            | .01                | <b>.48</b>  | .23                   |  |
| 298               | -.12                             | -.09                            | .14                | <b>.47</b>  | .22                   |  |
| 419               | -.05                             | .09                             | -.08               | <b>.45</b>  | .18                   |  |
| 381               | .05                              | .05                             | .04                | <b>.44</b>  | .27                   |  |
| 143               | -.23                             | .09                             | -.08               | <b>.43</b>  | .13                   |  |
| 313               | -.23                             | -.03                            | .19                | <b>.43</b>  | .19                   |  |
| 95                | .09                              | -.04                            | .15                | <b>-.42</b> | .12                   |  |
| 536               | .24                              | -.06                            | -.10               | <b>.40</b>  | .24                   |  |
| 484               | .14                              | -.06                            | .05                | <b>.39</b>  | .24                   |  |
| 215               | .13                              | .13                             | <b>-.34</b>        | <b>.39</b>  | .19                   |  |
| 459               | .09                              | -.05                            | .10                | <b>.37</b>  | .21                   |  |
| 338               | .11                              | .02                             | .17                | <b>.37</b>  | .32                   |  |
| 398               | .16                              | -.06                            | .15                | .29         | .23                   |  |

| Components        |                                  |                                 |                    |            |                       |  |
|-------------------|----------------------------------|---------------------------------|--------------------|------------|-----------------------|--|
| Item <sup>1</sup> | Neuroticism/Negative Affectivity | Somatic Complaints <sup>2</sup> | Psychotic/Paranoid | Antisocial | <i>h</i> <sup>2</sup> |  |
| 518               | .19                              | -.14                            | .24                | .28        | .27                   |  |
| 383               | .26                              | -.07                            | .15                | .27        | .29                   |  |
| 279               | -.21                             | .08                             | .21                | .26        | .13                   |  |
| 359               | .25                              | .02                             | .12                | .26        | .30                   |  |
| 375               | .20                              | -.11                            | .25                | .25        | .28                   |  |
| 303               | .24                              | .00                             | .14                | .24        | .28                   |  |
| 146               | .06                              | .01                             | .22                | .24        | .20                   |  |

*Note.* <sup>1</sup>Item number for the 1943 Minnesota Multiphasic Personality Inventory. <sup>2</sup>Loadings on this component have been reflected.

Table S3

*Individual Cox regressions of Neuroticism/Negative Affectivity, Somatic Complaints, Psychotic/Paranoid, Antisocial, and Personal Disturbance as predictors of all-cause mortality when controlling for age and ethnicity*

| Predictor                                  | HR   | 95% CI |       | p      |
|--------------------------------------------|------|--------|-------|--------|
|                                            |      | lower  | upper |        |
| Age                                        | 1.06 | 1.01   | 1.11  | .025   |
| Ethnic group                               |      |        |       |        |
| Black vs. White                            | 2.34 | 1.70   | 3.20  | < .001 |
| Other vs. White                            | 1.80 | 1.16   | 2.79  | .008   |
| Neuroticism/Negative Affectivity (z-score) | 1.55 | 1.39   | 1.72  | < .001 |
| Age                                        | 1.06 | 1.01   | 1.12  | .016   |
| Ethnic group                               |      |        |       |        |
| Black vs. White                            | 1.92 | 1.40   | 2.64  | < .001 |
| Other vs. White                            | 1.49 | 0.96   | 2.31  | .078   |
| Somatic Complaints (z-score)               | 1.66 | 1.52   | 1.80  | < .001 |
| Age                                        | 1.06 | 1.01   | 1.11  | .020   |
| Ethnic group                               |      |        |       |        |
| Black vs. White                            | 1.83 | 1.33   | 2.52  | < .001 |
| Other vs. White                            | 1.31 | 0.84   | 2.05  | .239   |
| Psychotic/Paranoid (z-score)               | 1.44 | 1.32   | 1.57  | < .001 |
| Age                                        | 1.08 | 1.03   | 1.14  | .001   |
| Ethnic group                               |      |        |       |        |
| Black vs. White                            | 1.77 | 1.29   | 2.44  | < .001 |
| Other vs. White                            | 1.39 | 0.90   | 2.17  | .142   |

| Predictor                      | <i>HR</i> | 95% <i>CI</i> |       | <i>p</i> |
|--------------------------------|-----------|---------------|-------|----------|
|                                |           | lower         | upper |          |
| Antisocial (z-score)           | 1.79      | 1.59          | 2.01  | < .001   |
| Age                            | 1.08      | 1.03          | 1.13  | .003     |
| Ethnic group                   |           |               |       |          |
| Black vs. White                | 1.83      | 1.33          | 2.52  | < .001   |
| Other vs. White                | 1.30      | 0.84          | 2.03  | .241     |
| Personal Disturbance (z-score) | 1.74      | 1.58          | 1.91  | < .001   |

*Note.* Effects for the components are per standard deviation. 95% *CI* = 95% confidence interval. *HR* = hazard ratio.

Table S4

*Cox regression of Neuroticism/Negative Affectivity as a predictor of all-cause mortality when controlling for age, ethnicity, and the covariates*

| Predictor                                   | <i>HR</i> | 95% <i>CI</i> |       | <i>p</i> |
|---------------------------------------------|-----------|---------------|-------|----------|
|                                             |           | lower         | upper |          |
| Age                                         | 1.06      | 1.00          | 1.11  | .035     |
| Ethnic group                                |           |               |       |          |
| Black vs. White                             | 1.46      | 0.99          | 2.14  | .054     |
| Other vs. White                             | 1.53      | 0.96          | 2.42  | .073     |
| Marital status                              |           |               |       |          |
| Divorced/separated/widowed vs. Married      | 1.45      | 1.06          | 1.99  | .021     |
| Never married vs. Married                   | 1.96      | 1.33          | 2.90  | .001     |
| Army General Technical Test                 | 1.01      | 0.86          | 1.19  | .876     |
| Family income                               |           |               |       |          |
| \$20,001-\$40,000 vs. ≤ \$20,000            | 0.87      | 0.65          | 1.18  | .374     |
| > \$40,000 vs. ≤ \$20,000                   | 0.51      | 0.30          | 0.86  | .011     |
| Educational achievement                     |           |               |       |          |
| 9-12 years vs. ≤ 8 years                    | 1.04      | 0.50          | 2.16  | .926     |
| 13-16 years vs. ≤ 8 years                   | 0.72      | 0.33          | 1.57  | .409     |
| 17-18 years vs. ≤ 8 years                   | 0.80      | 0.29          | 2.15  | .652     |
| Pulse rate/minute ( <i>z</i> -score)        | 1.22      | 1.08          | 1.39  | .002     |
| Somatic conditions present vs. absent       | 1.72      | 1.25          | 2.37  | .001     |
| Systolic blood pressure ( <i>z</i> -score)  | 1.04      | 0.88          | 1.23  | .665     |
| Diastolic blood pressure ( <i>z</i> -score) | 1.01      | 0.85          | 1.20  | .894     |
| Blood glucose (mg/dl) ( <i>z</i> -score)    | 1.11      | 1.04          | 1.18  | .001     |

| Predictor                                       | <i>HR</i> | 95% <i>CI</i> |       | <i>p</i> |
|-------------------------------------------------|-----------|---------------|-------|----------|
|                                                 |           | lower         | upper |          |
| FEV <sub>1</sub> (z-score)                      | 0.84      | 0.74          | 0.96  | .011     |
| Body mass index                                 |           |               |       |          |
| Overweight (25-30) vs. Normal (< 25)            | 0.74      | 0.55          | 1.00  | .053     |
| Obese (>30) vs. Normal (< 25)                   | 1.07      | 0.73          | 1.57  | .719     |
| Major depression present vs. absent             | 1.11      | 0.71          | 1.71  | .653     |
| Generalized anxiety disorder present vs. absent | 1.32      | 0.91          | 1.91  | .142     |
| Drinking                                        |           |               |       |          |
| Nondrinker vs. Never drinker                    | 1.58      | 0.87          | 2.89  | .134     |
| Never binges vs. Never drinker                  | 1.06      | 0.59          | 1.91  | .856     |
| 1 binge/month vs. Never drinker                 | 1.49      | 0.83          | 2.68  | .181     |
| 2-7 binges/month vs. Never drinker              | 1.39      | 0.71          | 2.70  | .337     |
| ≥ 8 binges/month vs. Never drinker              | 2.11      | 1.13          | 3.94  | .019     |
| Smoking                                         |           |               |       |          |
| Former smoker vs. Non-smoker                    | 0.91      | 0.60          | 1.40  | .675     |
| Current Smoker vs. Non-smoker                   | 1.37      | 0.95          | 1.97  | .093     |
| Neuroticism/Negative Affectivity (z-score)      | 1.25      | 1.09          | 1.43  | .001     |

*Note.* 95% *CI* = 95% confidence interval. *HR* = hazard ratio.



Table S5

*Cox regression of Somatic Complaints as a predictor of all-cause mortality when controlling for age, ethnicity, and the covariates*

| Predictor                                   | HR   | 95% CI |       | p      |
|---------------------------------------------|------|--------|-------|--------|
|                                             |      | lower  | upper |        |
| Age                                         | 1.06 | 1.00   | 1.11  | .036   |
| Ethnic group                                |      |        |       |        |
| Black vs. White                             | 1.42 | 0.96   | 2.09  | .076   |
| Other vs. White                             | 1.43 | 0.90   | 2.28  | .129   |
| Marital status                              |      |        |       |        |
| Divorced/separated/widowed vs. Married      | 1.53 | 1.11   | 2.10  | .009   |
| Never married vs. Married                   | 2.08 | 1.41   | 3.07  | < .001 |
| Total Army General Technical Test (z-score) | 1.08 | 0.92   | 1.28  | .346   |
| Family income                               |      |        |       |        |
| \$20,001-\$40,000 vs. ≤ \$20,000            | 0.94 | 0.70   | 1.27  | .689   |
| > \$40,000 vs. ≤ \$20,000                   | 0.54 | 0.32   | 0.91  | .021   |
| Educational achievement                     |      |        |       |        |
| 9-12 years vs. ≤ 8 years                    | 1.09 | 0.52   | 2.29  | .822   |
| 13-16 years vs. ≤ 8 years                   | 0.75 | 0.34   | 1.65  | .480   |
| 17-18 years vs. ≤ 8 years                   | 0.85 | 0.31   | 2.30  | .749   |
| Pulse rate/minute (z-score)                 | 1.22 | 1.07   | 1.38  | .003   |
| Somatic conditions present vs. absent       | 1.50 | 1.08   | 2.08  | .016   |
| Systolic blood pressure (z-score)           | 1.05 | 0.89   | 1.25  | .575   |
| Diastolic blood pressure (z-score)          | 1.00 | 0.84   | 1.19  | .990   |
| Blood glucose (mg/dl) (z-score)             | 1.11 | 1.04   | 1.18  | .001   |

| Predictor                                       | <i>HR</i> | 95% <i>CI</i> |       | <i>p</i> |
|-------------------------------------------------|-----------|---------------|-------|----------|
|                                                 |           | lower         | upper |          |
| FEV <sub>1</sub> (z-score)                      | 0.85      | 0.75          | 0.98  | .020     |
| Body mass index                                 |           |               |       |          |
| Overweight (25-30) vs. Normal (< 25)            | 0.76      | 0.56          | 1.02  | .070     |
| Obese (>30) vs. Normal (< 25)                   | 1.08      | 0.73          | 1.58  | .713     |
| Major depression present vs. absent             | 0.97      | 0.63          | 1.49  | .879     |
| Generalized anxiety disorder present vs. absent | 1.13      | 0.78          | 1.65  | .515     |
| Drinking                                        |           |               |       |          |
| Nondrinker vs. Never drinker                    | 1.46      | 0.80          | 2.67  | .217     |
| Never binges vs. Never drinker                  | 1.01      | 0.56          | 1.82  | .985     |
| 1 binge/month vs. Never drinker                 | 1.38      | 0.77          | 2.48  | .286     |
| 2-7 binges/month vs. Never drinker              | 1.27      | 0.65          | 2.47  | .490     |
| ≥ 8 binges/month vs. Never drinker              | 1.98      | 1.06          | 3.69  | .031     |
| Smoking                                         |           |               |       |          |
| Former smoker vs. Non-smoker                    | 0.90      | 0.59          | 1.38  | .636     |
| Current Smoker vs. Non-smoker                   | 1.34      | 0.93          | 1.93  | .122     |
| Somatic Complaints (z-score)                    | 1.44      | 1.29          | 1.61  | < .001   |

*Note.* 95% *CI* = 95% confidence interval. *HR* = hazard ratio.

Table S6

*Cox regression of Psychotic/Paranoid as a predictor of all-cause mortality when controlling for age, ethnicity, and the covariates*

| Predictor                                   | HR   | 95% CI |       | p    |
|---------------------------------------------|------|--------|-------|------|
|                                             |      | lower  | upper |      |
| Age                                         | 1.06 | 1.00   | 1.11  | .040 |
| Ethnic group                                |      |        |       |      |
| Black vs. White                             | 1.32 | 0.90   | 1.94  | .152 |
| Other vs. White                             | 1.31 | 0.82   | 2.10  | .252 |
| Marital status                              |      |        |       |      |
| Divorced/separated/widowed vs. Married      | 1.51 | 1.10   | 2.07  | .010 |
| Never married vs. Married                   | 1.96 | 1.32   | 2.89  | .001 |
| Total Army General Technical Test (z-score) | 1.11 | 0.94   | 1.32  | .218 |
| Family income                               |      |        |       |      |
| \$20,001-\$40,000 vs. ≤ \$20,000            | 0.89 | 0.66   | 1.20  | .437 |
| > \$40,000 vs. ≤ \$20,000                   | 0.51 | 0.30   | 0.86  | .011 |
| Educational achievement                     |      |        |       |      |
| 9-12 years vs. ≤ 8 years                    | 1.02 | 0.49   | 2.14  | .955 |
| 13-16 years vs. ≤ 8 years                   | 0.68 | 0.31   | 1.49  | .335 |
| 17-18 years vs. ≤ 8 years                   | 0.70 | 0.26   | 1.89  | .481 |
| Pulse rate/minute (z-score)                 | 1.23 | 1.08   | 1.40  | .001 |
| Somatic conditions present vs. absent       | 1.68 | 1.22   | 2.32  | .002 |
| Systolic blood pressure (z-score)           | 1.02 | 0.87   | 1.21  | .782 |
| Diastolic blood pressure (z-score)          | 1.02 | 0.86   | 1.22  | .792 |
| Blood glucose (mg/dl) (z-score)             | 1.12 | 1.05   | 1.19  | .001 |

| Predictor                                       | <i>HR</i> | 95% <i>CI</i> |       | <i>p</i> |
|-------------------------------------------------|-----------|---------------|-------|----------|
|                                                 |           | lower         | upper |          |
| FEV <sub>1</sub> (z-score)                      | 0.85      | 0.74          | 0.97  | .014     |
| Body mass index                                 |           |               |       |          |
| Overweight (25-30) vs. Normal (< 25)            | 0.74      | 0.55          | 1.00  | .050     |
| Obese (>30) vs. Normal (< 25)                   | 1.09      | 0.74          | 1.59  | .671     |
| Major depression present vs. absent             | 1.05      | 0.67          | 1.63  | .841     |
| Generalized anxiety disorder present vs. absent | 1.27      | 0.87          | 1.84  | .215     |
| Drinking                                        |           |               |       |          |
| Nondrinker vs. Never drinker                    | 1.67      | 0.92          | 3.04  | .094     |
| Never binges vs. Never drinker                  | 1.11      | 0.61          | 2.00  | .736     |
| 1 binge/month vs. Never drinker                 | 1.53      | 0.85          | 2.75  | .153     |
| 2-7 binges/month vs. Never drinker              | 1.47      | 0.76          | 2.87  | .254     |
| ≥ 8 binges/month vs. Never drinker              | 2.29      | 1.23          | 4.26  | .009     |
| Smoking                                         |           |               |       |          |
| Former smoker vs. Non-smoker                    | 0.92      | 0.60          | 1.41  | .705     |
| Current Smoker vs. Non-smoker                   | 1.41      | 0.98          | 2.03  | .066     |
| Psychotic/Paranoid (z-score)                    | 1.27      | 1.14          | 1.42  | < .001   |

Note. 95% *CI* = 95% confidence interval. *HR* = hazard ratio.

Table S7

*Cox regression of Antisocial as a predictor of all-cause mortality when controlling for age, ethnicity, and the covariates*

| Predictor                                   | HR   | 95% CI |       | p    |
|---------------------------------------------|------|--------|-------|------|
|                                             |      | lower  | upper |      |
| Age                                         | 1.07 | 1.01   | 1.12  | .012 |
| Ethnic group                                |      |        |       |      |
| Black vs. White                             | 1.34 | 0.92   | 1.96  | .130 |
| Other vs. White                             | 1.36 | 0.85   | 2.16  | .195 |
| Marital status                              |      |        |       |      |
| Divorced/separated/widowed vs. Married      | 1.44 | 1.05   | 1.98  | .022 |
| Never married vs. Married                   | 1.92 | 1.30   | 2.83  | .001 |
| Total Army General Technical Test (z-score) | 1.07 | 0.91   | 1.27  | .399 |
| Family income                               |      |        |       |      |
| \$20,001-\$40,000 vs. ≤ \$20,000            | 0.87 | 0.64   | 1.16  | .335 |
| > \$40,000 vs. ≤ \$20,000                   | 0.50 | 0.30   | 0.84  | .009 |
| Educational achievement                     |      |        |       |      |
| 9-12 years vs. ≤ 8 years                    | 1.00 | 0.48   | 2.10  | .991 |
| 13-16 years vs. ≤ 8 years                   | 0.73 | 0.34   | 1.59  | .429 |
| 17-18 years vs. ≤ 8 years                   | 0.83 | 0.31   | 2.24  | .712 |
| Pulse rate/minute (z-score)                 | 1.25 | 1.10   | 1.42  | .001 |
| Somatic conditions present vs. absent       | 1.67 | 1.21   | 2.30  | .002 |
| Systolic blood pressure (z-score)           | 1.02 | 0.86   | 1.20  | .844 |
| Diastolic blood pressure (z-score)          | 1.03 | 0.86   | 1.23  | .749 |
| Blood glucose (mg/dl) (z-score)             | 1.09 | 1.03   | 1.16  | .006 |

| Predictor                                       | <i>HR</i> | 95% <i>CI</i> |       | <i>p</i> |
|-------------------------------------------------|-----------|---------------|-------|----------|
|                                                 |           | lower         | upper |          |
| FEV <sub>1</sub> (z-score)                      | 0.84      | 0.74          | 0.96  | .012     |
| Body mass index                                 |           |               |       |          |
| Overweight (25-30) vs. Normal (< 25)            | 0.72      | 0.53          | 0.98  | .034     |
| Obese (>30) vs. Normal (< 25)                   | 1.07      | 0.73          | 1.57  | .718     |
| Major depression present vs. absent             | 1.19      | 0.79          | 1.81  | .402     |
| Generalized anxiety disorder present vs. absent | 1.33      | 0.93          | 1.90  | .114     |
| Drinking                                        |           |               |       |          |
| Nondrinker vs. Never drinker                    | 1.50      | 0.82          | 2.74  | .188     |
| Never binges vs. Never drinker                  | 0.99      | 0.55          | 1.80  | .984     |
| 1 binge/month vs. Never drinker                 | 1.31      | 0.73          | 2.36  | .369     |
| 2-7 binges/month vs. Never drinker              | 1.20      | 0.62          | 2.35  | .592     |
| ≥ 8 binges/month vs. Never drinker              | 1.78      | 0.95          | 3.34  | .073     |
| Smoking                                         |           |               |       |          |
| Former smoker vs. Non-smoker                    | 0.88      | 0.57          | 1.34  | .545     |
| Current Smoker vs. Non-smoker                   | 1.19      | 0.83          | 1.72  | .350     |
| Antisocial (z-score)                            | 1.44      | 1.25          | 1.65  | < .001   |

*Note.* 95% *CI* = 95% confidence interval. *HR* = hazard ratio.

Table S8

*Cox regression of Personal Disturbance as a predictor of all-cause mortality when controlling for age, ethnicity, and the covariates*

| Predictor                                   | HR   | 95% CI |       | p    |
|---------------------------------------------|------|--------|-------|------|
|                                             |      | lower  | upper |      |
| Age                                         | 1.06 | 1.01   | 1.12  | .020 |
| Ethnic group                                |      |        |       |      |
| Black vs. White                             | 1.43 | 0.97   | 2.09  | .068 |
| Other vs. White                             | 1.34 | 0.84   | 2.14  | .214 |
| Marital status                              |      |        |       |      |
| Divorced/separated/widowed vs. Married      | 1.47 | 1.07   | 2.02  | .017 |
| Never married vs. Married                   | 1.98 | 1.34   | 2.92  | .001 |
| Total Army General Technical Test (z-score) | 1.12 | 0.95   | 1.33  | .176 |
| Family income                               |      |        |       |      |
| \$20,001-\$40,000 vs. ≤ \$20,000            | 0.93 | 0.69   | 1.25  | .611 |
| > \$40,000 vs. ≤ \$20,000                   | 0.56 | 0.33   | 0.93  | .026 |
| Educational achievement                     |      |        |       |      |
| 9-12 years vs. ≤ 8 years                    | 1.07 | 0.51   | 2.24  | .866 |
| 13-16 years vs. ≤ 8 years                   | 0.75 | 0.34   | 1.65  | .475 |
| 17-18 years vs. ≤ 8 years                   | 0.84 | 0.31   | 2.26  | .725 |
| Pulse rate/minute (z-score)                 | 1.21 | 1.07   | 1.38  | .003 |
| Somatic conditions present vs. absent       | 1.56 | 1.13   | 2.16  | .007 |
| Systolic blood pressure (z-score)           | 1.04 | 0.88   | 1.23  | .674 |
| Diastolic blood pressure (z-score)          | 1.02 | 0.85   | 1.21  | .861 |
| Blood glucose (mg/dl) (z-score)             | 1.11 | 1.05   | 1.18  | .001 |

| Predictor                                       | <i>HR</i> | 95% <i>CI</i> |       | <i>p</i> |
|-------------------------------------------------|-----------|---------------|-------|----------|
|                                                 |           | lower         | upper |          |
| FEV <sub>1</sub> (z-score)                      | 0.85      | 0.75          | 0.98  | .020     |
| Body mass index                                 |           |               |       |          |
| Overweight (25-30) vs. Normal (< 25)            | 0.74      | 0.55          | 1.00  | .047     |
| Obese (>30) vs. Normal (< 25)                   | 1.06      | 0.73          | 1.56  | .756     |
| Major depression present vs. absent             | 0.86      | 0.56          | 1.33  | .495     |
| Generalized anxiety disorder present vs. absent | 1.06      | 0.73          | 1.53  | .778     |
| Drinking                                        |           |               |       |          |
| Nondrinker vs. Never drinker                    | 1.46      | 0.80          | 2.66  | .219     |
| Never binges vs. Never drinker                  | 1.01      | 0.56          | 1.81  | .987     |
| 1 binge/month vs. Never drinker                 | 1.35      | 0.75          | 2.43  | .317     |
| 2-7 binges/month vs. Never drinker              | 1.26      | 0.65          | 2.45  | .501     |
| ≥ 8 binges/month vs. Never drinker              | 1.88      | 1.01          | 3.50  | .047     |
| Smoking                                         |           |               |       |          |
| Former smoker vs. Non-smoker                    | 0.92      | 0.60          | 1.42  | .717     |
| Current Smoker vs. Non-smoker                   | 1.34      | 0.93          | 1.93  | .121     |
| Personal Disturbance (z-score)                  | 1.53      | 1.35          | 1.74  | < .001   |

*Note.* 95% *CI* = 95% confidence interval. *HR* = hazard ratio.



Table S9

*Cox regression of Neuroticism/Negative Affectivity as a predictor of all-cause mortality when controlling for age, ethnicity, the covariates, and Personal Disturbance*

| Predictor                                   | HR   | 95% CI |       | p    |
|---------------------------------------------|------|--------|-------|------|
|                                             |      | lower  | upper |      |
| Age                                         | 1.07 | 1.01   | 1.12  | .016 |
| Ethnic group                                |      |        |       |      |
| Black vs. White                             | 1.33 | 0.90   | 1.96  | .154 |
| Other vs. White                             | 1.23 | 0.77   | 1.97  | .387 |
| Marital status                              |      |        |       |      |
| Divorced/separated/widowed vs. Married      | 1.52 | 1.10   | 2.08  | .010 |
| Never married vs. Married                   | 2.00 | 1.35   | 2.95  | .001 |
| Total Army General Technical Test (z-score) | 1.18 | 1.00   | 1.40  | .057 |
| Family income                               |      |        |       |      |
| \$20,001-\$40,000 vs. ≤ \$20,000            | 0.93 | 0.69   | 1.26  | .654 |
| > \$40,000 vs. ≤ \$20,000                   | 0.55 | 0.33   | 0.92  | .023 |
| Educational achievement                     |      |        |       |      |
| 9-12 years vs. ≤ 8 years                    | 1.05 | 0.50   | 2.21  | .896 |
| 13-16 years vs. ≤ 8 years                   | 0.73 | 0.33   | 1.61  | .436 |
| 17-18 years vs. ≤ 8 years                   | 0.79 | 0.29   | 2.14  | .646 |
| Pulse rate/minute (z-score)                 | 1.23 | 1.08   | 1.40  | .002 |
| Somatic conditions present vs. absent       | 1.51 | 1.09   | 2.09  | .014 |
| Systolic blood pressure (z-score)           | 1.03 | 0.87   | 1.22  | .760 |
| Diastolic blood pressure (z-score)          | 1.02 | 0.86   | 1.22  | .797 |
| Blood glucose (mg/dl) (z-score)             | 1.11 | 1.04   | 1.18  | .001 |

| Predictor                                       | <i>HR</i> | 95% <i>CI</i> |       | <i>p</i> |
|-------------------------------------------------|-----------|---------------|-------|----------|
|                                                 |           | lower         | upper |          |
| FEV <sub>1</sub> (z-score)                      | 0.86      | 0.75          | 0.98  | .027     |
| Body mass index                                 |           |               |       |          |
| Overweight (25-30) vs. Normal (< 25)            | 0.74      | 0.55          | 1.00  | .048     |
| Obese (>30) vs. Normal (< 25)                   | 1.08      | 0.74          | 1.59  | .691     |
| Major depression present vs. absent             | 0.89      | 0.57          | 1.39  | .612     |
| Generalized anxiety disorder present vs. absent | 1.06      | 0.73          | 1.55  | .766     |
| Drinking                                        |           |               |       |          |
| Nondrinker vs. Never drinker                    | 1.47      | 0.80          | 2.68  | .211     |
| Never binges vs. Never drinker                  | 1.01      | 0.56          | 1.82  | .973     |
| 1 binge/month vs. Never drinker                 | 1.32      | 0.73          | 2.37  | .360     |
| 2-7 binges/month vs. Never drinker              | 1.24      | 0.64          | 2.42  | .526     |
| ≥ 8 binges/month vs. Never drinker              | 1.89      | 1.01          | 3.51  | .046     |
| Smoking                                         |           |               |       |          |
| Former smoker vs. Non-smoker                    | 0.91      | 0.59          | 1.40  | .667     |
| Current Smoker vs. Non-smoker                   | 1.31      | 0.91          | 1.89  | .150     |
| Personal Disturbance (z-score)                  | 1.94      | 1.57          | 2.40  | < .001   |
| Neuroticism/Negative Affectivity (z-score)      | 0.73      | 0.58          | 0.92  | .007     |

*Note.* 95% *CI* = 95% confidence interval. *HR* = hazard ratio.
